# Supplementary material for: Prolonged nicotine exposure reduces aversion to the drug in mice by altering nicotinic transmission in the interpeduncular nucleus
Source: eLife. 2023 May 30;12:e80767. doi: 10.7554/eLife.80767 (PMC10259488; doi:10.7554/eLife.80767)
Supplement: Figure 1—source data 1. [file elife-80767-fig1-data1.xlsx]

## Sheet: Figure1.C
	MOUSE 1	MOUSE 2	MOUSE 3	MOUSE 4	MOUSE 5	MOUSE 6	MOUSE 7	MOUSE 8	MOUSE 9	MOUSE 10	MOUSE 11	MOUSE 12	MOUSE 13	MOUSE 14	MOUSE 15	MOUSE 16	MOUSE 17	MOUSE 18	MOUSE 19	MOUSE 20	MOUSE 21	MOUSE 22	MOUSE 23	MOUSE 24	MOUSE 25	MOUSE 26	MOUSE 27	MOUSE 28	MOUSE 29	MOUSE 30	MOUSE 31	MOUSE 32	MOUSE 33	MOUSE 34	MOUSE 35
0 ug/ml	0	0	0	0	0	0	0	0	0	0	0	0	0	0	0	0	0	0	0	0	0	0	0	0	0	0	0	0	0	0	0	0	0	0	0
10 ug/ml	1.03229166666667	1.272375	1.55072463768116	1.998	1.93333333333333	1.26346153846154	0.215	0.13125	1.10673076923077	0.7875	0.250997150997151	1.4039886039886	0.949038461538461	1.02923789173789	0.520916666666667	0.206521739130435	0.41852766798419	1.19791666666667	1.52931034482759	1.16869230769231	1.14464285714286	1.295	0.890384615384615	2.01538461538462	0.423	0.817391304347826	0.5375	0.846	1.976	1.22	0.836	0.825846153846154	2.1195652173913	0.311458333333333	0.239583333333333
50 ug/ml	2.881875	0.770833333333334	6.29861111111111	8.28365384615385	9.64102564102564	12.435625	0.762884615384615	0.505	6.30173076923077	4.96153846153846	0.394230769230769	3.68634615384615	2.63461538461538	4.83333333333333	2.245	0.333333333333333	0.947916666666667	7.13673076923077	6.225	5.35826923076923	5.75892857142857	6.82	5.41666666666667	8.85096153846154	0.584807692307692	0.915833333333333	0.222826086956522	5.015	9.87019230769231	5.14423076923077	5.07211538461538	6.335	2.32291666666667	0.333333333333333	0.373541666666667
100 ug/ml	18.9991666666667	2.61458333333333	13.6388888888889	17.0192307692308	17.2307692307692	1.90384615384615	0.796410256410256	0.645833333333333	10.1942307692308	6.43269230769231	1.625	11.0053846153846	4.90384615384615	9.64423076923077	2.95192307692308	1.32541666666667	3.35416666666667	13.5947293447293	10.7083333333333	10.0576923076923	11.5320197044335	10.5	3.87037037037037	17.656339031339	7.96153846153846	2.33333333333333	0.682971014492754	4.65	19.3942307692308	9.32692307692307	10.4326923076923	0.509615384615384	1.32291666666667	0.822916666666667	0.85
200 ug/ml	3.5	0.6875	18.7083333333333	4.59615384615384	31.8461538461538	2.21153846153846	0.621082621082621	1.92	1.11538461538462	9.36538461538462	3.980769	13.1153846153846	5.55769230769231	31.28	3.54692307692308	1.02083333333333	4.64	4.88161375661375	12.9833333333333	15.5384615384615	1.21428571428571	5.64	4.09259259259259	36.9230769230769	11.6176923076923	3.78	1.54166666666667	11.8523076923077	45.4238461538462	17.5769230769231	25.2692307692308	4.74846153846154	2.95833333333333	1.8125	1.16

## Sheet: Fig1.D
	MOUSE 1	MOUSE 2	MOUSE 3	MOUSE 4	MOUSE 5	MOUSE 6	MOUSE 7	MOUSE 8	MOUSE 9	MOUSE 10	MOUSE 11	MOUSE 12	MOUSE 13	MOUSE 14	MOUSE 15	MOUSE 16	MOUSE 17	MOUSE 18	MOUSE 19	MOUSE 20	MOUSE 21	MOUSE 22	MOUSE 23	MOUSE 24	MOUSE 25	MOUSE 26	MOUSE 27	MOUSE 28	MOUSE 29	MOUSE 30	MOUSE 31	MOUSE 32	MOUSE 33	MOUSE 34	MOUSE 35
0 ug/ml	38.0567443022619	47.0174750497635	50.3166607220232	51.2099161242268	55.765916062137	29.7793342753961	52.6623219164567	48.1898962487747	46.93788579858	47.8509771478521	28.9621403275529	64.5238992131257	33.7778128582436	33.2496144834781	67.1294246906662	62.4823886732642	40.4699253340246	57.4495531627982	52.1965825632552	53.1762054810774	42.0715289582497	62.3783604097924	68.2587987429386	64.0592380142518	44.8349769851259	32.6497374058124	47.9127258960437	74.1550444972819	57.8434920171195	54.2743852188493	23.107195163037	37.543852642737	57.9170130578411	42.9833024902029	36.4194040424484
10 ug/ml	46.5795837793576	60.4425488259008	92.9838357885806	87.5214593895888	71.2233455315305	67.7229407972231	13.2178308475822	6.29462861739896	47.1614912172817	31.6186523916545	11.8453257812466	71.737756026494	45.6000219381777	42.1947187329117	24.8490858304852	9.27844741863037	19.6779173143689	53.4718586790412	58.2413706085054	64.7779676224257	46.9905680106319	54.2578640475516	40.5825140388393	93.3226716918703	21.4012745289164	31.438541730744	25.6418317785425	37.912031041501	87.3221383490846	51.338491739675	39.4916183571589	34.6749949580385	80.8019140553673	17.1160735917622	10.6632929317326
50 ug/ml	26.182331619536	5.7543243052108	54.6666666666667	92.904883501145	95.3657174762702	91.52895742558	8.23794104208646	4.11542965890792	55.3987248484974	39.7052458401324	3.61799908958656	35.6138990767316	25.7909036388257	40.2140330663675	18.532137148015	3.04634735761167	9.08881387947777	53.4212025198419	49.0670967519766	55.2962235516716	49.3956257712345	54.0672523636849	48.1658388258618	96.1084665969892	5.16948223883124	7.57347126885609	2.05323952897435	39.7785859491849	93.4046358824194	49.4291182764637	51.7742213805413	61.7052635127811	21.3583697177939	3.55069564394855	3.38693642265071
100 ug/ml	81.7979670982254	9.01020333678253	58.4967320261438	94.4319100215517	85.5792929652387	6.90730370962929	4.72804084384246	2.82808862459821	48.0897117556703	28.6520704014217	7.4427829115149	52.8738445636631	27.1435503330372	39.2517156475275	10.7277597508233	3.68711796781316	13.0705409609908	48.5243473640665	43.5144929757137	58.7648312910035	49.3109462441816	39.2593141757691	17.0533067727274	96.0138687347663	41.0982902726473	7.82296501888858	3.51352703005157	17.480433631122	89.477643594883	44.2488733499366	48.026813547965	2.65436772540636	5.635908341936	3.59555495893441	3.89941538109635
200 ug/ml	7.67060936335035	1.41138535599214	48.2590144919577	10.3579245277514	83.4153084769306	4.97575674334412	2.11042789444566	3.93582661005564	2.18252685996897	22.8992671019392	15.25527	34.6277832039897	12.6366695808309	49.697512088038	7.52659712093396	1.79630124477171	9.28236335990635	8.12661925583141	22.5303801974607	50.4205467029937	2.66488839408385	11.3564261892265	9.52248964040712	96.269916339364	31.9193908184318	6.81059591910944	3.62443772902904	25.456534117689	92.1192458184201	43.7202502447536	55.0262327554007	13.3902804034992	6.25848907254371	3.77037882252788	2.65704547817142

## Sheet: Fig1.E-F
	Non-Avoider 1	Non-Avoider 2	Non-Avoider 3	Non-Avoider 4	Non-Avoider 5	Non-Avoider 6	Non-Avoider 7	Non-Avoider 8	Non-Avoider 9	Non-Avoider 10	Non-Avoider 11	Non-Avoider 12	Non-Avoider 13	Non-Avoider 14	Non-Avoider 15	Non-Avoider 16	Non-Avoider 17	Non-Avoider 18
0 ug/ml	0	0	0	0	0	0	0	0	0	0	0	0	0	0	0	0	0	0
10 ug/ml	1.55072463768116	1.93333333333333	0.7875	0.250997150997151	1.4039886039886	0.949038461538461	1.02923789173789	0.520916666666667	0.41852766798419	1.52931034482759	1.16869230769231	2.01538461538462	0.423	0.817391304347826	0.846	1.976	1.22	0.836
50 ug/ml	6.29861111111111	9.64102564102564	4.96153846153846	0.394230769230769	3.68634615384615	2.63461538461538	4.83333333333333	2.245	0.947916666666667	6.225	5.35826923076923	8.85096153846154	0.584807692307692	0.915833333333333	5.015	9.87019230769231	5.14423076923077	5.07211538461538
100 ug/ml	13.6388888888889	17.2307692307692	6.43269230769231	1.625	11.0053846153846	4.90384615384615	9.64423076923077	2.95192307692308	3.35416666666667	10.7083333333333	10.0576923076923	17.656339031339	7.96153846153846	2.33333333333333	4.65	19.3942307692308	9.32692307692307	10.4326923076923
200 ug/ml	18.7083333333333	31.8461538461538	9.36538461538462	5.769231	13.1153846153846	5.55769230769231	31.28	3.54692307692308	4.64	12.9833333333333	15.5384615384615	36.9230769230769	11.6176923076923	3.78	11.8523076923077	45.4238461538462	17.5769230769231	25.2692307692308
	Avoider 1	Avoider 2	Avoider 3	Avoider 4	Avoider 5	Avoider 6	Avoider 7	Avoider 8	Avoider 9	Avoider 10	Avoider 11	Avoider 12	Avoider 13	Avoider 14	Avoider 15	Avoider 16	Avoider 17
0 ug/ml	0	0	0	0	0	0	0	0	0	0	0	0	0	0	0	0	0
10 ug/ml	1.03229166666667	1.272375	1.998	1.26346153846154	0.215	0.13125	1.10673076923077	0.206521739130435	1.19791666666667	1.14464285714286	1.295	0.890384615384615	0.5375	0.825846153846154	2.1195652173913	0.311458333333333	0.239583333333333
50 ug/ml	2.881875	0.770833333333334	8.28365384615385	12.435625	0.762884615384615	0.505	6.30173076923077	0.333333333333333	7.13673076923077	5.75892857142857	6.82	5.41666666666667	0.222826086956522	6.335	2.32291666666667	0.333333333333333	0.373541666666667
100 ug/ml	18.9991666666667	2.61458333333333	17.0192307692308	1.90384615384615	0.796410256410256	0.645833333333333	10.1942307692308	1.32541666666667	13.5947293447293	11.5320197044335	10.5	3.87037037037037	0.682971014492754	0.509615384615384	1.32291666666667	0.822916666666667	0.85
200 ug/ml	3.5	0.6875	4.59615384615384	2.21153846153846	0.621082621082621	1.92	1.11538461538462	1.02083333333333	4.88161375661375	1.21428571428571	5.64	4.09259259259259	1.54166666666667	4.74846153846154	2.95833333333333	1.8125	1.16
	min_diff	max_diff				min_diff	max_diff
Non.Avoider 1	1.55072463768116	7.34027777777778			Avoider 1	-15.4991666666667	16.1172916666667
Non.Avoider 2	1.93333333333333	14.6153846153846			Avoider 2	-1.92708333333333	1.84375
Non.Avoider 3	0.7875	4.17403846153846			Avoider 3	-12.4230769230769	8.73557692307692
Non.Avoider 4	0.143233618233618	4.144231			Avoider 4	-10.5317788461538	11.1721634615385
Non.Avoider 5	1.4039886039886	7.31903846153846			Avoider 5	-0.175327635327635	0.547884615384615
Non.Avoider 6	0.653846153846155	2.26923076923077			Avoider 6	0.13125	1.27416666666667
Non.Avoider 7	1.02923789173789	21.6357692307692			Avoider 7	-9.07884615384615	5.195
Non.Avoider 8	0.520916666666667	1.72408333333333			Avoider 8	-0.304583333333333	0.992083333333334
Non.Avoider 9	0.41852766798419	2.40625			Avoider 9	-8.71311558811559	6.45799857549858
Non.Avoider 10	1.52931034482759	4.69568965517241			Avoider 10	-10.3177339901478	5.77309113300492
Non.Avoider 11	1.16869230769231	5.48076923076923			Avoider 11	-4.86	5.525
Non.Avoider 12	2.01538461538462	19.2667378917379			Avoider 12	-1.5462962962963	4.52628205128205
Non.Avoider 13	0.161807692307692	7.37673076923077			Avoider 13	-0.314673913043478	0.858695652173913
Non.Avoider 14	0.0984420289855074	1.44666666666667			Avoider 14	-5.82538461538462	5.50915384615385
Non.Avoider 15	-0.364999999999999	7.20230769230769			Avoider 15	-1	2.1195652173913
Non.Avoider 16	1.976	26.0296153846154			Avoider 16	0.0218750000000001	0.989583333333333
Non.Avoider 17	1.22	8.25000000000001			Avoider 17	0.133958333333333	0.476458333333333
Non.Avoider 18	0.836	14.8365384615385

## Sheet: Fig1.G
	Non-Avoider 1	Non-Avoider 2	Non-Avoider 3	Non-Avoider 4	Non-Avoider 5	Non-Avoider 6	Non-Avoider 7	Non-Avoider 8	Non-Avoider 9	Non-Avoider 10	Non-Avoider 11	Non-Avoider 12	Non-Avoider 13	Non-Avoider 14	Non-Avoider 15	Non-Avoider 16	Non-Avoider 17	Non-Avoider 18
D-13	32.695652173913	14.5384615384615	7.23076923076923	1.61538461538462	24.3461538461538	8.96153846153846	22.3461538461538	3.61538461538462	5.375	14.2	8.84615384615384	13.7692307692308	11	1.375	9.56	16.4615384615385	3.15384615384615	16.0769230769231
D-14	0	18.2307692307692	6.07692307692308	1.61538461538462	10.1153846153846	5.5	0	3.92307692307692	6	16.6333333333333	1.57692307692308	19.1153846153846	17.1923076923077	0.958333333333333	3.8	19.3076923076923	0	19.6923076923077
D-15	25.6666666666667	18.5	9.26923076923077	2.03846153846154	7.68	2.38461538461538	9	0.692307692307692	1.29166666666667	7.2	14.5769230769231	17.1111111111111	2.5	7	5.08	21.0384615384615	16.8076923076923	2.88461538461538
D-16	15.25	17.6538461538461	3.15384615384615	1.23076923076923	1.88	2.76923076923077	7.23076923076923	3.57692307692308	0.75	4.8	15.2307692307692	20.6296296296296	1.15384615384615	0	0.16	20.7692307692308	17.3461538461538	3.07692307692308
D-17	10.75	38.6923076923077	12.5384615384615	3.84615384615385	17.1538461538462	8.30769230769231	24.96	6	6.56	25	6	34	29.9230769230769	3.6	18.6153846153846	46.32	17	41.3846153846154
D-18	3.58333333333333	32.4615384615385	11.9230769230769	4.92307692307692	9.07692307692308	3.61538461538462	4	0.88	1.92	13.7333333333333	3.53846153846154	34.2307692307692	10.3076923076923	2.64	12.1538461538462	37.76	0	34.2307692307692
D-19	26.5	49.5384615384615	6.44444444444444	7.15384615384615	17.9230769230769	4.76923076923077	1.92307692307692	5.46153846153846	7.92	8.06666666666667	24.5384615384615	40.9230769230769	3.2	3.2	8.8	45.8461538461538	27.5384615384615	16.4615384615385
D-20	34	6.69230769230769	8.88888888888889	7.15384615384615	20.8461538461538	4.23076923076923	8.07692307692308	1.84615384615385	2.16	5.13333333333333	28.0769230769231	38.5384615384615	3.04	5.68	7.84	51.7692307692308	25.7692307692308	9
	Avoider 1	Avoider 2	Avoider 3	Avoider 4	Avoider 5	Avoider 6	Avoider 7	Avoider 8	Avoider 9	Avoider 10	Avoider 11	Avoider 12	Avoider 13	Avoider 14	Avoider 15	Avoider 16	Avoider 17
D-13	18.0833333333333	2.04166666666667	16.9615384615385	3.19230769230769	0.76	0.833333333333333	19.08	2.58333333333333	11.8846153846154	2.93103448275862	13.56	11.0740740740741	0.869565217391304	0.23076923076923	3.5	1.29166666666667	0.8
D-14	12.8333333333333	1	17.6153846153846	1.19230769230769	0.36	0.375	19.12	1.95833333333333	1.34615384615385	0.482758620689655	7.64	1.59259259259259	0.695652173913044	0	0.541666666666666	0.583333333333333	0.72
D-15	22.32	7.41666666666667	16.3461538461538	2.42307692307692	1.26923076923077	1	1.84615384615384	0.32	18.037037037037	19.9642857142857	10.2	2.51851851851852	0.875	1.30769230769231	0.75	0.916666666666667	1.8
D-16	22.76	0	17.1538461538462	0.807692307692308	1.26923076923077	0.375	0.730769230769231	0.44	23.1111111111111	22.75	10.6	0.296296296296296	0.291666666666667	0.5	0.5	0.5	0.0800000000000001
D-17	7.36000000000001	1	11.2307692307692	4.15384615384615	0.692307692307692	2.72	1.46153846153846	1.41666666666667	8.74074074074074	3.21428571428571	17.2	7.62962962962963	2.25	13.84	6.58333333333333	4.16666666666667	2.32
D-18	1.36	0.5	0	1.92307692307692	0.384615384615385	1.76	0.076923076923077	0.75	2	1.21428571428571	2.64	6.2962962962963	0.666666666666667	0	0.416666666666667	0.333333333333334	0.16
D-19	4	1	6.84615384615385	2.76923076923077	1.40740740740741	2.88	1.16666666666667	1.41666666666667	4.42857142857143	0.357142857142857	1.6	0.592592592592593	3.25	3.15384615384615	3.25	1.66666666666667	1.6
D-20	1.28	0.25	0.307692307692307	0	0	0.32	2.66666666666667	0.5	4.35714285714286	0.0714285714285714	1.12	1.85185185185185	0	2	1.58333333333333	1.08333333333333	0.56

## Sheet: Fig 1- Fig. Supp1.A
	MOUSE 1	MOUSE 2	MOUSE 3	MOUSE 4	MOUSE 5	MOUSE 6	MOUSE 7	MOUSE 8	MOUSE 9	MOUSE 10	MOUSE 11	MOUSE 12	MOUSE 13	MOUSE 14	MOUSE 15	MOUSE 16	MOUSE 17	MOUSE 18	MOUSE 19	MOUSE 20	MOUSE 21	MOUSE 22	MOUSE 23	MOUSE 24	MOUSE 25	MOUSE 26	MOUSE 27	MOUSE 28	MOUSE 29	MOUSE 30	MOUSE 31	MOUSE 32	MOUSE 33	MOUSE 34	MOUSE 35
D-1	9.45626477541371	9.69072164948454	34.1232227488152	85.3881278538813	72.5321888412017	4.39330543933054	88.8178913738019	4.64601769911504	42.8571428571428	70	9.52380952380952	23.9393939393939	55.7377049180328	8.31556503198294	93.6363636363636	39.6088019559902	24.6105919003115	11.7647058823529	84.7736625514403	48.2837528604119	8.17204301075269	84.5977011494253	78.2894736842105	71.2244897959184	61.0869565217391	19.1897654584222	36.1924686192469	78.1632653061224	28.9351851851852	26.3546798029557	33.3333333333333	23.4126984126984	51.7786561264822	82.9201101928375	21.3114754098361
D-2	49.8901098901099	4.36363636363636	5.13513513513513	43.8888888888889	76.2063227953411	1.25588697017268	83.7150127226463	4.41988950276243	90.3083700440529	20.3125	5.31177829099307	100	41.3092550790068	0	75.583864118896	63.2411067193676	35.3099730458221	41.4376321353066	73.5294117647059	69.0026954177898	10.4347826086957	85.3763440860215	85.5805243445693	86.5566037735849	44.7033898305085	18.8679245283019	71.2053571428571	78.4580498866213	63.2558139534884	13.9211136890951	23.7529691211401	22.2222222222222	71.7842323651452	72.168905950096	5.7356608478803
D-3	46.8131868131868	83.0540037243948	66.4788732394366	47.6666666666667	29.1060291060291	59.5432300163132	22.4056603773585	88.0998080614204	20.6315789473684	43.8186813186813	47.2789115646259	58.7016574585635	25.0980392156863	87.6602564102564	50.3562945368171	82.0796460176991	50.4798464491363	81.9838056680162	30.4526748971193	39.8843930635838	69.7879858657244	39.6584440227704	39.2063492063492	52.1097046413502	47.3441108545035	21.8390804597701	53.0474040632054	59.0697674418605	66.4556962025317	84.5470692717584	21.6796875	43.0020283975659	45.0854700854701	7.5187969924812	49.4199535962877
D-4	46.0674157303371	90.9615384615385	95.5294117647059	27.8959810874704	45.2191235059761	53.9249146757679	15.7107231920199	95.5938697318008	33.9544513457557	57.2727272727273	53.7340619307832	75.4545454545455	12.9662522202487	91.4332784184514	48.9411764705882	65	51.4792899408284	94.6120689655172	20.0305810397554	55.5339805825243	79.8913043478261	39.8809523809524	69.9588477366255	46.3461538461538	26.2054507337526	70.7021791767554	31.2056737588653	80.9290953545232	72.7272727272727	92.274678111588	13.6627906976744	61.5384615384615	63.019693654267	9.32539682539682	69.2105263157895
D-5	40.5829596412556	49.6402877697841	10.7954545454545	73.8931297709924	90.8108108108108	49.0616621983914	42.3173803526448	20.0404858299595	76.4309764309764	42.0807453416149	31.4338235294118	65.7200811359026	55.2459016393443	24.4766505636071	27.5142314990512	30.9338521400778	34.6080305927342	20.4641350210971	84.8011363636364	57.9136690647482	11.2813370473538	72.0588235294118	13.8528138528138	90.6040268456376	48.7632508833922	38.6363636363636	82.6271186440678	62.5708884688091	62.5207296849088	17.7902621722846	49.7899159663866	44.1679626749611	67.7740863787376	38.2775119617225	27.0903010033445
D-6	47.136563876652	6.44628099173554	100	92.8853754940711	92.2403003754693	57.2998430141287	4.04494382022472	2.21327967806841	91.9047619047619	35.0850077279753	6.79442508710801	100	84.9462365591398	3.44202898550725	14.4808743169399	1.07816711590297	31.0904872389791	5.42168674698795	91.5211970074813	41.6666666666667	2.07100591715976	95.4468802698145	0	93.2242990654206	11.8333333333333	38.382099827883	10.0213219616205	45.6475583864119	92.7893738140418	6.51769087523278	86.3716814159292	62.4784853700516	92.5663716814159	21.8978102189781	6.37065637065637
D-7	61.4664586583463	87.8195488721804	85.5704697986577	83.3073322932917	43.5331230283912	71.7391304347826	5.16129032258065	2.37226277372263	13.6206896551724	31.5047021943574	4.62962962962963	54.3478260869565	18.2776801405975	69.3370165745856	24.2424242424242	2.79850746268657	6.59722222222222	88.6509635974304	28.0912364945978	66.5995975855131	74.6099290780142	30.7471264367816	55.5555555555556	92.5476603119584	23.3812949640288	39.8373983739837	6.64335664335664	35.8273381294964	95.5116696588869	94.0476190476191	16.0320641282565	25.615763546798	73.8562091503268	7.34557595993322	7.55287009063444
D-8	37.1323529411765	97.8640776699029	93.3810375670841	100	77.8966131907308	92.7911275415897	1.34770889487871	0.552486187845304	6.68953687821613	17.8041543026706	4.52342487883683	66.8831168831169	23.9302694136292	71.523178807947	33.1588132635253	2.30326295585413	6.41592920353982	99.3506493506493	28.551912568306	92.9319371727749	100	18.7786259541985	92.921686746988	96.9147005444646	1.62721893491124	8.89830508474576	3.27552986512524	7.60233918128655	98.4667802385008	86.9983948635634	5.77281191806332	6.43776824034335	89.010989010989	0.943396226415094	1.63934426229508
D-9	45.7242582897033	13.1075110456554	63.4840871021776	86.4754098360656	53.9939332659252	88.7543252595156	14.2570281124498	4.54545454545455	75.5700325732899	44.5151033386327	4.59363957597173	56.0629921259843	50.6993006993007	59.0604026845638	31.6438356164384	8.03059273422562	17.9159049360146	52.7827648114901	71.8397997496871	51.0603588907015	9.15395284327323	92.5076452599388	80.3542673107891	97.7777777777778	7.38916256157635	11.8181818181818	2.45398773006135	60.233918128655	93.0711610486891	15.9332321699545	81.947261663286	88.8631090487239	55.6701030927835	5.17241379310345	4.26716141001855
D-10	35.15625	2.27963525835866	0	100	100	95.3451043338684	4.57516339869281	0	97.1978984238179	54.7864506627393	2.8006589785832	31.6425120772947	35.5460385438972	48.3732876712329	14.3953934740883	2.34833659491194	6.01336302895323	5.79310344827586	65.2472527472527	0	6.19469026548672	83.1932773109244	4.61049284578696	96.4989059080963	3.67132867132867	10.4404567699837	1.24740124740125	40.2255639097744	100	5.54561717352415	84.7583643122677	98.12734082397	18.75	2.02429149797571	3.14685314685315
D-11	15.4440154440154	4.93601462522852	64	85.1441241685144	86.0971524288107	92.7055702917772	10.0616016427105	11.9162640901771	23.3208955223881	26.60406885759	3.53159851301115	32.9853862212944	11.6152450090744	32.6388888888889	20.6106870229008	1.06571936056838	8.34990059642147	63.2307692307692	33.6088154269972	91.5	92.9307805596465	16.5079365079365	72.2962962962963	90.7488986784141	7.11743772241993	5.72755417956656	2.59259259259259	42.7927927927928	83.0618892508143	76.2376237623763	30.9734513274336	38.961038961039	10.6280193236715	5.26315789473684	3.86100386100386
D-12	8.40480274442539	2.69413629160063	100	100	100	89.3108298171589	4.05797101449275	0	25.5060728744939	32.9153605015674	3.54609929078014	21.7647058823529	5.3030303030303	28.9428076256499	7.47863247863248	0.740740740740741	4.07608695652174	91.8781725888325	25.5725190839695	78.6245353159851	89.3030794165316	24.0601503759399	35.4022988505747	99.4082840236686	2.5	2.30769230769231	1.91897654584222	15.8620689655172	97.4854932301741	100	9.41780821917808	20.8695652173913	0.385356454720617	1.74291938997821	2.27272727272727
D-13	63.8235294117647	8.37606837606837	61.8930041152263	86.1328125	54.7033285094067	12.4624624624625	4.32801822323462	3.7593984962406	83.6842105263158	29.375	8.15533980582524	79.0262172284644	50.1075268817204	60.8376963350785	12.9120879120879	7.45192307692308	20.9756097560976	30.9929789368104	54.8262548262548	40	12.4269005847953	53.9808917197452	42.112676056338	94.7089947089947	54.4761904761905	5.31400966183575	4.54545454545455	35.832083958021	87.8850102669405	13.6894824707846	76.9797421731123	1.57894736842105	13.8157894736842	5.68807339449541	3.78787878787879
D-14	83.9237057220708	4.08858603066439	0	100	100	4.65465465465465	2.03619909502262	1.73076923076923	97.9508196721311	25.9016393442623	7.47330960854092	49.0671641791045	33.4894613583138	0	13.8211382113821	5.07011866235167	21.8844984802432	4.85436893203883	74.3666169895678	8.55949895615867	1.99714693295293	29.3846153846154	8.41487279843444	98.2213438735178	90.6693711967546	3.81426202321725	3.73831775700935	17.1790235081374	91.7733089579525	0	87.8216123499142	0	2.81995661605206	2.3728813559322	3.23159784560144
D-15	82.179675994109	23.5761589403974	75.4901960784314	91.5948275862069	87.6138433515483	6.97674418604652	7.81990521327014	4.27046263345196	8.04020100502511	45.3860640301318	7.29023383768913	69.8181818181818	11.1310592459605	47.4645030425963	3.00500834724541	0.998751560549313	6.39175257731959	66.078697421981	28.1984334203655	92.2141119221411	88.4493670886076	35.814606741573	15.8508158508158	91.304347826087	13.2113821138211	22.1635883905013	4.33884297520661	16.0353535353535	85.46875	71.6393442622951	12.0967741935484	6.57640232108317	3.53634577603143	4.07407407407407	8.22669104204753
D-16	97.2649572649573	0	100	100	100	3.53535353535354	7.81990521327014	1.55172413793103	2.68361581920904	13.9455782312925	6.85224839400428	13.5838150289017	13.8461538461539	48.7046632124352	13.1728045325779	1.22767857142857	3.03030303030303	92.1713441654357	16.6666666666667	94.2857142857143	94.3703703703704	37.8571428571429	1.8348623853211	99.8207885304659	6.03621730382294	0	1.43149284253579	0.875273522975931	92.7835051546392	91.6666666666667	15.2091254752852	2.46212121212121	2.37154150197628	2.24719101123596	0.351493848857645
D-17	16.4579606440072	2.13523131672598	23.3695652173913	25.6590509666081	67.6985195154778	8.94039735099338	2.09302325581395	5.34591194968554	3.14049586776859	32.2772277227723	10.2040816326531	31.811697574893	18.3986371379898	27.9319606087735	10.4456824512535	1.86608122941822	11.4047287899861	14.8802017654477	40.938864628821	17.7676537585421	7.06436420722135	35.5960264900662	16.0436137071651	93.8428874734607	80.2061855670103	7.02028081123245	5.22243713733075	25.8547008547009	92.3444976076555	27.7638190954774	76.2039660056657	39.7701149425287	12.7009646302251	8.18330605564648	5.18783542039356
D-18	3.05206463195691	1.01694915254237	7.55711775043937	0	94.407158836689	4.64684014869888	1.30890052356021	3.85288966725044	0.353356890459364	26.271186440678	12.3076923076923	32.5068870523416	8.65561694290976	40.650406504065	1.56028368794326	1.0250569476082	3.80952380952381	3.32512315270936	24.6411483253589	9.76645435244161	2.59541984732824	4.88165680473373	15.7992565055762	96.3203463203463	31.1627906976744	4.72103004291846	1.78970917225951	28.5198555956679	97.9253112033195	0	84.4402277039848	0	1.07991360691145	0.742115027829314	0.404040404040404
D-19	8.37520938023451	1.99667221297837	62.109375	14.9579831932773	71.5555555555556	6.31578947368421	5.03978779840849	5.85365853658536	3.84615384615385	16.7630057803468	19.2546583850932	48.3402489626556	11.588785046729	7.37463126843658	12.6334519572954	3.15985130111524	17.3076923076923	6.94288913773796	15.3748411689962	85.9838274932615	0.830564784053157	2.97619047619048	1.6260162601626	95.5116696588869	9.11161731207289	5.48696844993141	7.48560460652591	25.2293577981651	93.125	68.8461538461538	37.2173913043478	8.15109343936382	7.94297352342159	3.80952380952381	3.81679389312977
D-20	2.7972027972028	0.496688741721854	100	0.814663951120161	100	0	0	0.69084628670121	6.91144708423326	23.4375	19.2546583850932	44.8675496688742	10.2803738317757	18.9530685920578	5.46697038724373	1.13421550094518	4.60750853242321	7.35826296743064	9.16666666666667	88.1642512077295	0.169204737732657	1.97183098591549	4.62107208872458	99.4047619047619	7.1969696969697	10.0141043723554	0	22.2222222222222	85.0821744627054	78.2710280373832	22.2433460076046	5.63991323210412	3.31010452961672	2.34657039711191	1.21951219512195

## Sheet: Supp1.B
	Non-Avoider 1	Non-Avoider 2	Non-Avoider 3	Non-Avoider 4	Non-Avoider 5	Non-Avoider 6	Non-Avoider 7	Non-Avoider 8	Non-Avoider 9	Non-Avoider 10	Non-Avoider 11	Non-Avoider 12	Non-Avoider 13	Non-Avoider 14	Non-Avoider 15	Non-Avoider 16	Non-Avoider 17	Non-Avoider 18
0 ug/ml	50.3166607220232	55.765916062137	47.8509771478521	28.9621403275529	64.5238992131257	33.7778128582436	33.2496144834781	67.1294246906662	40.4699253340246	52.1965825632552	53.1762054810774	64.0592380142518	44.8349769851259	32.6497374058124	74.1550444972819	57.8434920171195	54.2743852188493	23.107195163037
10 ug/ml	92.9838357885806	71.2233455315305	31.6186523916545	11.8453257812466	71.737756026494	45.6000219381777	42.1947187329117	24.8490858304852	19.6779173143689	58.2413706085054	64.7779676224257	93.3226716918703	21.4012745289164	31.438541730744	37.912031041501	87.3221383490846	51.338491739675	39.4916183571589
50 ug/ml	54.6666666666667	95.3657174762702	39.7052458401324	3.61799908958656	35.6138990767316	25.7909036388257	40.2140330663675	18.532137148015	9.08881387947777	49.0670967519766	55.2962235516716	96.1084665969892	5.16948223883124	7.57347126885609	39.7785859491849	93.4046358824194	49.4291182764637	51.7742213805413
100 ug/ml	58.4967320261438	85.5792929652387	28.6520704014217	7.4427829115149	52.8738445636631	27.1435503330372	39.2517156475275	10.7277597508233	13.0705409609908	43.5144929757137	58.7648312910035	96.0138687347663	41.0982902726473	7.82296501888858	17.480433631122	89.477643594883	44.2488733499366	48.026813547965
200 ug/ml	48.2590144919577	83.4153084769306	22.8992671019392	15.25527	34.6277832039897	12.6366695808309	49.697512088038	7.52659712093396	9.28236335990635	22.5303801974607	50.4205467029937	96.269916339364	31.9193908184318	6.81059591910944	25.456534117689	92.1192458184201	43.7202502447536	55.0262327554007
	Avoider 1	Avoider 2	Avoider 3	Avoider 4	Avoider 5	Avoider 6	Avoider 7	Avoider 8	Avoider 9	Avoider 10	Avoider 11	Avoider 12	Avoider 13	Avoider 14	Avoider 15	Avoider 16	Avoider 17
0 ug/ml	38.0567443022619	47.0174750497635	51.2099161242268	29.7793342753961	52.6623219164567	48.1898962487747	46.93788579858	62.4823886732642	57.4495531627982	42.0715289582497	62.3783604097924	68.2587987429386	47.9127258960437	37.543852642737	57.9170130578411	42.9833024902029	36.4194040424484
10 ug/ml	46.5795837793576	60.4425488259008	87.5214593895888	67.7229407972231	13.2178308475822	6.29462861739896	47.1614912172817	9.27844741863037	53.4718586790412	46.9905680106319	54.2578640475516	40.5825140388393	25.6418317785425	34.6749949580385	80.8019140553673	17.1160735917622	10.6632929317326
50 ug/ml	26.182331619536	5.7543243052108	92.904883501145	91.52895742558	8.23794104208646	4.11542965890792	55.3987248484974	3.04634735761167	53.4212025198419	49.3956257712345	54.0672523636849	48.1658388258618	2.05323952897435	61.7052635127811	21.3583697177939	3.55069564394855	3.38693642265071
100 ug/ml	81.7979670982254	9.01020333678253	94.4319100215517	6.90730370962929	4.72804084384246	2.82808862459821	48.0897117556703	3.68711796781316	48.5243473640665	49.3109462441816	39.2593141757691	17.0533067727274	3.51352703005157	2.65436772540636	5.635908341936	3.59555495893441	3.89941538109635
200 ug/ml	7.67060936335035	1.41138535599214	10.3579245277514	4.97575674334412	2.11042789444566	3.93582661005564	2.18252685996897	1.79630124477171	8.12661925583141	2.66488839408385	11.3564261892265	9.52248964040712	3.62443772902904	13.3902804034992	6.25848907254371	3.77037882252788	2.65704547817142
	Non-Avoider 1	Non-Avoider 2	Non-Avoider 3	Non-Avoider 4	Non-Avoider 5	Non-Avoider 6	Non-Avoider 7	Non-Avoider 8	Non-Avoider 9	Non-Avoider 10	Non-Avoider 11	Non-Avoider 12	Non-Avoider 13	Non-Avoider 14	Non-Avoider 15	Non-Avoider 16	Non-Avoider 17	Non-Avoider 18
D-13	61.8930041152263	54.7033285094067	29.375	8.15533980582524	79.0262172284644	50.1075268817204	60.8376963350785	12.9120879120879	20.9756097560976	54.8262548262548	40	94.7089947089947	54.4761904761905	5.31400966183575	35.832083958021	87.8850102669405	13.6894824707846	76.9797421731123
D-14	0	100	25.9016393442623	7.47330960854092	49.0671641791045	33.4894613583138	0	13.8211382113821	21.8844984802432	74.3666169895678	8.55949895615867	98.2213438735178	90.6693711967546	3.81426202321725	17.1790235081374	91.7733089579525	0	87.8216123499142
D-15	75.4901960784314	87.6138433515483	45.3860640301318	7.29023383768913	69.8181818181818	11.1310592459605	47.4645030425963	3.00500834724541	6.39175257731959	28.1984334203655	92.2141119221411	91.304347826087	13.2113821138211	22.1635883905013	16.0353535353535	85.46875	71.6393442622951	12.0967741935484
D-16	100	100	13.9455782312925	6.85224839400428	13.5838150289017	13.8461538461539	48.7046632124352	13.1728045325779	3.03030303030303	16.6666666666667	94.2857142857143	99.8207885304659	6.03621730382294	0	0.875273522975931	92.7835051546392	91.6666666666667	15.2091254752852
D-17	23.3695652173913	67.6985195154778	32.2772277227723	10.2040816326531	31.811697574893	18.3986371379898	27.9319606087735	10.4456824512535	11.4047287899861	40.938864628821	17.7676537585421	93.8428874734607	80.2061855670103	7.02028081123245	25.8547008547009	92.3444976076555	27.7638190954774	76.2039660056657
D-18	7.55711775043937	94.407158836689	26.271186440678	12.3076923076923	32.5068870523416	8.65561694290976	40.650406504065	1.56028368794326	3.80952380952381	24.6411483253589	9.76645435244161	96.3203463203463	31.1627906976744	4.72103004291846	28.5198555956679	97.9253112033195	0	84.4402277039848
D-19	62.109375	71.5555555555556	16.7630057803468	19.2546583850932	48.3402489626556	11.588785046729	7.37463126843658	12.6334519572954	17.3076923076923	15.3748411689962	85.9838274932615	95.5116696588869	9.11161731207289	5.48696844993141	25.2293577981651	93.125	68.8461538461538	37.2173913043478
D-20	100	100	23.4375	19.2546583850932	44.8675496688742	10.2803738317757	18.9530685920578	5.46697038724373	4.60750853242321	9.16666666666667	88.1642512077295	99.4047619047619	7.1969696969697	10.0141043723554	22.2222222222222	85.0821744627054	78.2710280373832	22.2433460076046
	Avoider 1	Avoider 2	Avoider 3	Avoider 4	Avoider 5	Avoider 6	Avoider 7	Avoider 8	Avoider 9	Avoider 10	Avoider 11	Avoider 12	Avoider 13	Avoider 14	Avoider 15	Avoider 16	Avoider 17
D-13	63.8235294117647	8.37606837606837	86.1328125	12.4624624624625	4.32801822323462	3.7593984962406	83.6842105263158	7.45192307692308	30.9929789368104	12.4269005847953	53.9808917197452	42.112676056338	4.54545454545455	1.57894736842105	13.8157894736842	5.68807339449541	3.78787878787879
D-14	83.9237057220708	4.08858603066439	100	4.65465465465465	2.03619909502262	1.73076923076923	97.9508196721311	5.07011866235167	4.85436893203883	1.99714693295293	29.3846153846154	8.41487279843444	3.73831775700935	0	2.81995661605206	2.3728813559322	3.23159784560144
D-15	82.179675994109	23.5761589403974	91.5948275862069	6.97674418604652	7.81990521327014	4.27046263345196	8.04020100502511	0.998751560549313	66.078697421981	88.4493670886076	35.814606741573	15.8508158508158	4.33884297520661	6.57640232108317	3.53634577603143	4.07407407407407	8.22669104204753
D-16	97.2649572649573	0	100	3.53535353535354	7.81990521327014	1.55172413793103	2.68361581920904	1.22767857142857	92.1713441654357	94.3703703703704	37.8571428571429	1.8348623853211	1.43149284253579	2.46212121212121	2.37154150197628	2.24719101123596	0.351493848857645
D-17	16.4579606440072	2.13523131672598	25.6590509666081	8.94039735099338	2.09302325581395	5.34591194968554	3.14049586776859	1.86608122941822	14.8802017654477	7.06436420722135	35.5960264900662	16.0436137071651	5.22243713733075	39.7701149425287	12.7009646302251	8.18330605564648	5.18783542039356
D-18	3.05206463195691	1.01694915254237	0	4.64684014869888	1.30890052356021	3.85288966725044	0.353356890459364	1.0250569476082	3.32512315270936	2.59541984732824	4.88165680473373	15.7992565055762	1.78970917225951	0	1.07991360691145	0.742115027829314	0.404040404040404
D-19	8.37520938023451	1.99667221297837	14.9579831932773	6.31578947368421	5.03978779840849	5.85365853658536	3.84615384615385	3.15985130111524	6.94288913773796	0.830564784053157	2.97619047619048	1.6260162601626	7.48560460652591	8.15109343936382	7.94297352342159	3.80952380952381	3.81679389312977
D-20	2.7972027972028	0.496688741721854	0.814663951120161	0	0	0.69084628670121	6.91144708423326	1.13421550094518	7.35826296743064	0.169204737732657	1.97183098591549	4.62107208872458	0	5.63991323210412	3.31010452961672	2.34657039711191	1.21951219512195

## Sheet: Supp1.C
Quinine	Nic. Avoiders	Nic. Non Avoiders
6.21054389351841	2.92463371457986	53.7785588752197
4.9619323195633	0.756818947132114	97.2035794183445
2.36130536130536	0.407331975560081	24.854343220339
6.8129342373166	2.32342007434944	15.7811753463927
2.91595197255575	0.654450261780105	38.6872183606079
3.12145009137156	2.27186797697582	9.46799538734273
7.09681656960196	3.63240198734631	29.8017375480614
2.76638726406561	1.07963622427669	3.5136270375935
	5.34169306007	4.20851617097351
	1.38231229253045	16.9039074960128
	3.42674389532461	48.9653527800855
	10.2101642971504	97.8625541125541
	0.894854586129754	19.1798801973221
	2.81995661605206	7.36756720763694
	2.19500906826409	25.371038908945
	1.54434271247061	91.5037428330125
	0.811776299581177	39.1355140186916
		53.3417868557947

## Sheet: Supp1.D
Quinine 0 uM	49.5763039769
Quinine 30 uM	45.7145724805
Quinine 100 uM	20.9705878419
Quinine 300 uM	11.6049731009
	Nicotine 100 ug/ml	Quinine 30 uM	Quinine 100 uM	Quinine 300 uM
Mouse 1	9.196013040	49.08881607	30.010306674	16.347395812
Mouse 2	7.984429000	67.93611193	51.379436146	12.237297795
Mouse 3	10.619224897	61.19105799	7.141385756	4.723426413
Mouse 4	6.789438574	34.71490500	14.817461500	5.898170250
Mouse 5	3.080701764	39.05224685	17.167769015	8.571666957
Mouse 6	11.334382477	46.72292284	20.181915150	9.738719068
Mouse 7	8.628749676	44.32816993	27.641593595	16.636515583
Mouse 8	24.210484320	41.25402214	19.544047151	12.346652931
Mouse 9	58.697976888	52.04148852	22.572755487	9.784790541
Mouse 10	30.139488285	10.46983212	9.725701286	8.731866180
Mouse 11	19.290021767	61.53397376	44.872038128	40.305423268
Mouse 12	11.060028346	46.81447719	8.822163863	6.149824359
Mouse 13	10.599366889	46.33405448	9.095929551	7.048525702
Mouse 14	14.820223458	66.29203265	25.216689076	8.418274904
Mouse 15	43.701332118	17.94447575	6.369625250	7.136046750
