# Supplementary material for: Prolonged nicotine exposure reduces aversion to the drug in mice by altering nicotinic transmission in the interpeduncular nucleus
Source: eLife. 2023 May 30;12:e80767. doi: 10.7554/eLife.80767 (PMC10259488; doi:10.7554/eLife.80767)
Supplement: Figure 2—source data 1. [file elife-80767-fig2-data1.xlsx]

## Sheet: Fig2.A
	MOUSE 1	MOUSE 2	MOUSE 3	MOUSE 4	MOUSE 5	MOUSE 6
D-1	72.5321888412017	26.3546798029557	85.3881278538813	4.39330543933054	42.8571428571428	4.64601769911504
D-2	76.2063227953411	13.9211136890951	43.8888888888889	1.25588697017268	90.3083700440529	4.41988950276243
D-3	70.8939708939709	15.4529307282416	52.3333333333333	40.4567699836868	79.3684210526316	11.9001919385796
D-4	54.7808764940239	7.72532188841201	72.1040189125296	46.0750853242321	66.0455486542443	4.40613026819923
D-5	90.8108108108108	17.7902621722846	73.8931297709924	49.0616621983914	76.4309764309764	20.0404858299595
D-6	92.2403003754693	6.51769087523278	92.8853754940711	57.2998430141287	91.9047619047619	2.21327967806841
D-7	56.4668769716088	5.95238095238093	16.6926677067083	28.2608695652174	86.3793103448276	97.6277372262774
D-8	22.1033868092692	13.0016051364366	0	7.20887245841034	93.3104631217839	99.4475138121547
D-9	53.9939332659252	15.9332321699545	86.4754098360656	88.7543252595156	75.5700325732899	4.54545454545455
D-10	100	5.54561717352415	100	95.3451043338684	97.1978984238179	0
D-11	13.9028475711893	23.7623762376237	14.8558758314856	7.29442970822281	76.6791044776119	88.0837359098229
D-12	0	0	0	10.6891701828411	74.4939271255061	100
D-13	54.7033285094067	13.6894824707846	86.1328125	12.4624624624625	83.6842105263158	3.7593984962406
D-14	100	0	100	4.65465465465465	97.9508196721311	1.73076923076923
D-15	12.3861566484517	28.3606557377049	8.4051724137931	93.0232558139535	91.9597989949749	95.729537366548
D-16	0	8.33333333333334	0	96.4646464646465	97.316384180791	98.448275862069
D-17	67.6985195154778	27.7638190954774	25.6590509666081	8.94039735099338	3.14049586776859	5.34591194968554
D-18	94.407158836689	0	0	4.64684014869888	0.353356890459364	3.85288966725044
D-19	28.4444444444444	31.1538461538462	85.0420168067227	93.6842105263158	96.1538461538462	94.1463414634146
D-20	0	21.7289719626168	99.1853360488798	100	93.0885529157667	99.3091537132988

## Sheet: Fig2.C
	0 ug/ml				10 ug/ml				50 ug/ml				100 ug/ml				200 ug/ml
	0	Side	1		0	Side	1		0	Side	1		0	Side	1		0	Side	1
Non-Avoiders 1	0.589363036185336	0.193151141339845	0.58396538765678		0.74413771185518	0.398727221764897	0.32404648532129		0.621753863228819	0.258026871546281	0.49915671980759		0.657909120605324	0.235358090116984	0.495911695775955		0.583479960905721	0.172921918155396	0.612591686965623
Non-Avoiders 2	0.587870873945247	0.319217177248396	0.47986856866272		0.776634487265224	0.433480761831845	0.28417756734603		0.854007330360974	0.54666512433685	0.169920839912585		0.859738870740912	0.548709129781086	0.166027306663946		0.834487564287146	0.581886343861166	0.167521119299274
Non-Avoiders 3	0.479267938465076	0.473540614819385	0.522185995487739		0.32376528488709	0.467969223721034	0.687350646951705		0.409318963314784	0.413562865502004	0.611094998282953		0.286699987587924	0.534358186590038	0.713551311998291		0.25109752751796	0.519911432369381	0.754523272408908
Non-Avoiders 4	0.360965986628154	0.353880737008093	0.742329870712056		0.138977399202236	0.57286427223769	0.884538411751625		0.0361886476183632	0.681423602059447	0.963820334100041		0.074520507763881	0.65376605831563	0.92557962804239		0.157708094435882	0.576476590331008	0.848390469947617
Non-Avoiders 5	0.645744339407319	0.49619022290957	0.355679304450062		0.72594840403006	0.445421911937747	0.303720208059838		0.365544594627476	0.441695969695186	0.649110829617512		0.540414279031673	0.389333643477517	0.484324995956291		0.400383785482544	0.440758644293771	0.610471341983807
Non-Avoiders 6	0.368561438690803	0.388075680898246	0.678440326723701		0.517630981228846	0.25880715163132	0.596608241616208		0.310734745818489	0.406607164278854	0.762061683515428		0.308470371686109	0.42091451508352	0.743157428508538		0.122993535090627	0.616324702790332	0.877787186553249
Non-Avoiders 7	0.633873438069883	0.0795478557033116	0.681725777851388		0.507703743719842	0.231218758915619	0.643326291028828		0.437811363047402	0.393078030210849	0.588729016833507		0.402332788769868	0.425471317064007	0.613870800713626		0.259727955242221	0.473863667282176	0.770005373921274
Non-Avoiders 8	0.693681061709995	0.367549012512355	0.372296819166886		0.251458022831613	0.525571070091036	0.752495462203381		0.190677098956233	0.553318724257305	0.815913606398414		0.110475506818432	0.615254993469731	0.89311233481031		0.0767926194359059	0.644511438748089	0.924859537433198
Non-Avoiders 9	0.41812288260826	0.406240154355545	0.604506607308927		0.236792033103781	0.477051231821966	0.813948475429523		0.0953293653606495	0.624052360042989	0.909566605758209		0.155151700357423	0.556571207431804	0.873304775495922		0.0943232149330358	0.631918400329288	0.907331032025895
Non-Avoiders 10	0.587456620397746	0.231494944369008	0.548792884050109		0.654771062864704	0.217056393385188	0.513709774673274		0.5279120466138	0.305378235104062	0.545297344501546		0.483524499558179	0.296363936054767	0.602914655783647		0.247563721744481	0.483102195765119	0.781460294816548
Non-Avoiders 11	0.53456497475732	0.446461051880549	0.471418712627899		0.664892414668683	0.380031905624399	0.382782667626733		0.627988034982824	0.209156151001263	0.537070294326689		0.681360863588758	0.17819510484618	0.537546277645328		0.623354638475502	0.133531313945339	0.616571221554372
Non-Avoiders 12	0.657537352156702	0.378747807430922	0.388806647572043		0.933333003197088	0.650998226245495	0.0682426627520498		0.961139843864919	0.67261161232565	0.0402550310507458		0.9601492936835	0.67619152113019	0.0401159751918876		0.962772498960844	0.672568752572601	0.0391478986413012
Non-Avoiders 13	0.455537256862065	0.422566516217479	0.557507535991126		0.231769599661177	0.500733687945473	0.791006736222123		0.051820552710507	0.668866887742768	0.948312039840578		0.517659445928218	0.205532220330499	0.667836429453923		0.397948157497861	0.318618666641675	0.72109286481514
Non-Avoiders 14	0.353770273310245	0.403047277742174	0.687138019732395		0.322238508445427	0.467702190505775	0.689250913463489		0.0836669123600824	0.629052429677401	0.924949040135049		0.0847459434353428	0.629574406227127	0.922346233553851		0.0687515126393269	0.653621760943408	0.931941442424365
Non-Avoiders 15	0.742713925049422	0.518186644461819	0.261769143553401		0.412270680364779	0.35899147568199	0.641659172036384		0.411286097797445	0.408483590918047	0.611215620920926		0.196727820296676	0.523112127509857	0.83011635489023		0.255153013787942	0.54150741287006	0.745635553129871
Non-Avoiders 16	0.590244432018441	0.390478738063611	0.43762843736026		0.878556111422658	0.549516688946899	0.159430467403222		0.934570961386996	0.638801281013406	0.0730079736701889		0.894783340636353	0.634307205189951	0.10528226243148		0.921685936036146	0.63099597513134	0.0843803787525527
Non-Avoiders 17	0.641171485340645	0.164292838240736	0.570625244128704		0.645837980209514	0.108979939095195	0.624769446986331		0.627704558276909	0.113247047068469	0.636734361372413		0.57939898964194	0.138467088339766	0.671361096727662		0.529319077401808	0.211170017483108	0.637003674091782
Non-Avoiders 18	0.237379882600567	0.520497546959725	0.770847134912441		0.487537603948393	0.238505614927954	0.669223840071887		0.606446819387971	0.185066514713004	0.576448885101672		0.590604548422088	0.157502253957605	0.623119139216216		0.605620923663317	0.252102627179005	0.515996170597025
	0 ug/ml				10 ug/ml				50 ug/ml				100 ug/ml				200 ug/ml
	0	Side	1		0	Side	1		0	Side	1		0	Side	1		0	Side	1
Avoiders 1	0.389692162398552	0.432963010795657	0.625080071182582		0.466589225859413	0.474037390603814	0.534896092807692		0.298127966446165	0.429508722762192	0.75182022584299		0.821809146754689	0.527396537146708	0.198521867120884		0.0794877254778455	0.639349804193151	0.92352916100935
Avoiders 2	0.61724117957879	0.104445980478666	0.663805071366998		0.685785246644864	0.204654029536044	0.511322234992516		0.0607230881126283	0.653262245893534	0.942656250881369		0.0942869874281547	0.625307317481804	0.910321904197975		0.0142096316636201	0.696017967645717	0.985887522241849
Avoiders 3	0.529413127830316	0.36591416507868	0.506043414574819		0.876189533512385	0.592597196390763	0.13144927099408		0.929054796470954	0.656327483551739	0.0710291828953872		0.944417822304755	0.658749485886571	0.0573308176796895		0.106487281778662	0.618905716848348	0.896761423470914
Avoiders 4	0.401667356694919	0.306587576352789	0.75216353270174		0.692666727048843	0.396403714511728	0.354017483771769		0.915304388477036	0.645975986858955	0.084870342604		0.071019354483951	0.647655898703726	0.931073399103815		0.0529743121178727	0.659446806229206	0.950416299774725
Avoiders 5	0.624704547089684	0.16610614278914	0.580525049266088		0.165523116721016	0.54367847235723	0.873522343856982		0.0832176190129224	0.642467286761331	0.917696219493385		0.0596978781293904	0.652199957467378	0.94527440350893		0.021497833162222	0.689393369447827	0.978904284872509
Avoiders 6	0.650245702932676	0.0659627562818921	0.677511290833531		0.0793555476774061	0.628512907908057	0.938298849300798		0.0450913665366828	0.665170587808315	0.959022751637304		0.0282930646253564	0.686796595542654	0.971719468269485		0.0399137342542898	0.674980813132819	0.960664652197118
Avoiders 7	0.508830626650465	0.305091858481222	0.565818778979547		0.599472957093101	0.133000506041349	0.645087592455716		0.634752223547223	0.197663173890851	0.54308000177524		0.643295076563532	0.0751891251355276	0.672334976345479		0.039989527515595	0.669186937752811	0.964542323523362
Avoiders 8	0.634532564050313	0.408941737600564	0.391131437466971		0.114607887940184	0.59420103643313	0.90970655686628		0.0372467233654273	0.670442146464386	0.969773360764889		0.0449664486662998	0.662881416853184	0.963472688844575		0.0183022162794623	0.692000460339759	0.982043250689758
Avoiders 9	0.652079286859811	0.205494581884614	0.525562872638122		0.670957172996987	0.100873501256323	0.617046476705997		0.586194466184026	0.260919993650864	0.524594988336657		0.573673557126017	0.194553700063849	0.598844222535617		0.0818502296049648	0.644726946463075	0.918785652353016
Avoiders 10	0.533269442665535	0.189683545446246	0.665541673613168		0.619141667908799	0.101423663662965	0.665976759901012		0.646575213790876	0.0830072720177371	0.655855922946516		0.648374019676952	0.0793106682430478	0.658915733996706		0.0343349251996459	0.672963570199544	0.973591864801051
Avoiders 11	0.663491631766843	0.300584296408502	0.438923612065676		0.617565390820749	0.209424193787283	0.54426990637785		0.637540036641525	0.167190566320476	0.570186154731224		0.393340413377889	0.487738808456417	0.607890119413785		0.144175490345255	0.564267804807518	0.890874877988916
Avoiders 12	0.696153866590845	0.406546695750298	0.345621514247322		0.52722613665069	0.188629763438578	0.682874159996426		0.484999972488068	0.443544808986726	0.521448172684679		0.189268869863205	0.532151257468619	0.833520587415061		0.114727639227885	0.594935357950002	0.907035081126778
Avoiders 13	0.482608460619465	0.442630542835635	0.524076719899497		0.329433564171782	0.381161737553079	0.771809456816948		0.0206320552942984	0.691279853614651	0.979469698932121		0.0356927266765564	0.678126175003803	0.964885190132264		0.0362636995134843	0.681092528860635	0.96375634956239
Avoiders 14	0.403287428787152	0.374083280216605	0.641688162087327		0.393714582226879	0.348968382569284	0.67934621004118		0.694128316127037	0.216476026122723	0.49770357542792		0.0324399411321393	0.675173853251616	0.973634939426749		0.148822625445294	0.568592647799623	0.868528966571897
Avoiders 15	0.58045794248582	0.468099327639695	0.42260047543519		0.808043831792691	0.581892467120546	0.192084754707051		0.265980407886948	0.445696154252861	0.80223324726904		0.0624150602871435	0.648626941548041	0.944021966329136		0.0629031369105067	0.659585031248814	0.937436410207278
Avoiders 16	0.551547026480486	0.16958491001501	0.666736884097024		0.214760810538642	0.495222772941342	0.838928324654717		0.0355101545276219	0.682112486778522	0.964493161300589		0.0362176379280871	0.678974921145805	0.964054260982442		0.0383341618857006	0.675901178094919	0.962321116632552
Avoiders 17	0.430185110503508	0.303161392229501	0.675774480466633		0.122685190278559	0.589700660542009	0.895424925540402		0.0340202640845144	0.681239536128095	0.966135937596447		0.0391883765022437	0.677233197944663	0.96101374663995		0.0266067318197976	0.687567116037381	0.973430536101422

## Sheet: Fig2.D
	Non-Avoider 1	Non-Avoider 2	Non-Avoider 3	Non-Avoider 4	Non-Avoider 5	Non-Avoider 6	Non-Avoider 7	Non-Avoider 8
0 ug/ml	52.1965825632552	53.1762054810774	64.0592380142518	44.8349769851259	32.6497374058124	74.1550444972819	57.8434920171195	54.2743852188493
10 ug/ml	58.2413706085054	64.7779676224257	93.3226716918703	21.4012745289164	31.438541730744	37.912031041501	87.3221383490846	51.338491739675
50 ug/ml	49.0670967519766	55.2962235516716	96.1084665969892	5.16948223883124	7.57347126885609	39.7785859491849	93.4046358824194	49.4291182764637
100 ug/ml	43.5144929757137	58.7648312910035	96.0138687347663	41.0982902726473	7.82296501888858	17.480433631122	89.477643594883	44.2488733499366
200 ug/ml	22.5303801974607	50.4205467029937	96.269916339364	31.9193908184318	6.81059591910944	25.456534117689	92.1192458184201	43.7202502447536
50 ug/ml	51.3898141531778	96.4655864339531	90.0697326466832	37.9433436532906	20.9854131871189	44.6475390433294	84.2031726889653	18.5801205469542
	Avoider 1	Avoider 2	Avoider 3	Avoider 4	Avoider 5	Avoider 6	Avoider 7	Avoider 8
0 ug/ml	42.0715289582497	62.3783604097924	68.2587987429386	47.9127258960437	37.543852642737	57.9170130578411	42.9833024902029	36.4194040424484
10 ug/ml	46.9905680106319	54.2578640475516	40.5825140388393	25.6418317785425	34.6749949580385	80.8019140553673	17.1160735917622	10.6632929317326
50 ug/ml	49.3956257712345	54.0672523636849	48.1658388258618	2.05323952897435	61.7052635127811	21.3583697177939	3.55069564394855	3.38693642265071
100 ug/ml	49.3109462441816	39.2593141757691	17.0533067727274	3.51352703005157	2.65436772540636	5.635908341936	3.59555495893441	3.89941538109635
200 ug/ml	2.66488839408385	11.3564261892265	9.52248964040712	3.62443772902904	13.3902804034992	6.25848907254371	3.77037882252788	2.65704547817142
50 ug/ml	2.17880705977907	30.4464644741618	10.0456013161577	5.808044214217	14.1866103675355	5.53269999319226	4.60105738692437	2.78932456371248

## Sheet: Fig2.E
Current _Non-Avoiders	Current _ Avoiders
40.9541	733.67
276.06	210.541
208.572	38.0493
28.0178	240.6
309.847	390.982
477.024	24.5426
80.1741	434.406
47.3993	70.5658
24.3545	186.555
8.82915	294.971
124.523	897.318
98.4133	102.459
98.755	105.879
125.06	259.517
52.6378	944.4
92.6443	832.108
440.888	111.572
782.37	211.518
421.93	163.025
75.5769	152.325
331.624	136.62
55.3518	149.899
35.6929	472.823
120.981	38.0877
590.699	120.106
176.129	476.642
422.158	758.951
124.115	440.261
219.732	112.092
49.124	134.02
85.4312	341.842
29.0513	288.183
415.195	140.117
258.4	583.637
219.417	752.207
4.67463	147.331
78.2236	166.185
228.66	182.128
146.908	95.7843
38.0197	220.97
79.9363	219.448
95.1472	80.9548
134.282	790.866
119.066	126.985
51.9303	115.251
164.538	479.958
141.04	374.304
50.5207	373.386
171.416	177.973
301.942	899.862
35.7693	436.481
737.443	32.3645
	36.7221
	45.2373
	136.662
	402.704
	440.594

## Sheet: Fig2.F
	Non-avoider 1	Non-avoider 2	Non-avoider 3	Non-avoider 4	Non-avoider 5	Non-avoider 6	Non-avoider 7
Mean Current	183.5060375	76.0818214285714	279.5097375	223.54615	176.231647142857	102.226533333333	206.8249125
Nicotine intake	4.25	15.0769230769231	4.23076923076923	39.3076923076923	3.18518518518519	7.15384615384615	20.1538461538462
	Avoider 1	Avoider 2	Avoider 3	Avoider 4	Avoider 5	Avoider 6	Avoider 7
Mean Current	258.879077777778	443.528	180.5504625	336.5135	295.9612875	314.959725	303.8283625
Nicotine intake	2.8	0.56	7.84615384615385	1.30769230769231	2.3448275862069	3.44	2.66666666666667

## Sheet: Supp.1C
Day 1	47.07006013		Water
Day 2	51.35637997
Day 3	62.26051229
Day 4	69.00084196
Day 5	31.05068683		Nicotine 200 ug/ml
Day 6	10.71626140
Day 7	12.69355635
Day 8	12.56243090
Day 9	20.58462326		Nicotine 50 ug/ml -1
Day 10	21.34206376
Day 11	28.56598962
Day 12	32.97668035
Day 13	39.24277260		Nicotine 50 ug/ml -2
Day 14	40.28367122
Day 15	33.11255619
Day 16	40.90953270
0 ug/ml	57.42194859			0 ug/ml	200 ug/ml	50 ug/ml -1	50 ug/ml -2
200 ug/ml	16.75573387		Mouse 1	20.541354817	3.935840149	41.472226333	64.795728726
50 ug/ml -1	25.86733925		Mouse 2	71.349787737	21.917144915	8.490197935	6.500357998
50 ug/ml -2	38.38713318		Mouse 3	31.617988655	8.239483597	4.598488541	8.093770063
			Mouse 4	34.994503732	13.798745890	56.889132713	91.397453281
			Mouse 5	51.277446653	14.646287547	9.762170591	13.950890515
			Mouse 6	60.339529069	13.769371549	5.607558512	5.724000386
			Mouse 7	74.287186985	16.781419354	7.170589832	53.067138867
			Mouse 8	47.901438747	15.895712532	28.711285351	38.580259705
			Mouse 9	91.974886945	12.105923818	6.585502316	6.049619339
			Mouse 10	93.008079145	37.158373339	55.516359568	70.522654579
			Mouse 11	47.863999237	16.301520393	52.452326487	57.295415802
			Mouse 12	74.454588932	13.876926516	8.332748854	12.791614649
			Mouse 13	46.874540991	29.397790724	50.686823194	70.263827380

## Sheet: Supp.1DE
Avoiders ML	Avoiders DV	Avoiders current	Non-avoidrs ML	Non avoiders DV	Non avoiders current
92.3021811813406	4621.83569495303	-733.67	5.97038688106989	4499.68157936634	-40.9541
47.9621079445948	4469.82964496099	-210.541	56.0818341028499	4489.09409329725	-276.06
118.13405508677	4456.37637318898	-38.0493	110.014328928515	4482.20824709441	-208.572
25.0756249004936	4421.03168285305	-240.6	88.4015284190416	4408.09584461073	-28.0178
141.458366502149	4494.46744149021	-390.982	104.083744626652	4477.6707530648	-309.847
15.6424136284031	4361.64623467601	-24.5426	5.7315714058271	4482.20824709441	-477.024
48.6387517911161	4439.97771055564	-434.406	56.0818341028499	4450.8836172584	-80.1741
22.5680624104442	4421.03168285305	-294.971	62.4900493551982	4452.35631268906	-47.3993
62.4502467759911	4493.55198216844	-897.318	1.39309027224964	4489.09409329725	-120.981
63.4851138353765	4489.09409329725	-105.879	102.611049195988	4463.7000477631	-590.699
24.1203629995224	4415.93695271454	-259.517	40.4792230536539	4378.24391020538	-176.129
32.6381149498488	4532.31969431619	-944.4	37.6930425091546	4349.82486865149	-422.158
20.2197102372234	4518.9460277026	-832.108	41.5140901130393	4342.77981213183	-124.115
26.8667409648145	4458.1276866741	-111.572	76.8985830281802	4562.33083903837	-49.124
32.5983123706416	4490.04935519822	-211.518	104.083744626652	4471.74016876294	-85.4312
103.526508517752	4420.47444674415	-152.325	15.6424136284031	4456.37637318898	-29.0513
73.1969431619169	4532.31969431619	-136.62	146.990925011941	4571.60483999363	-415.195
9.99044738099029	4480.97436713899	-149.899	2.46775991084222	4479.85989492119	-258.4
103.526508517752	4470.46648622831	-472.823	35.5835058111766	4369.32813246298	-219.417
51.6637478108581	4501.59210316829	-38.0877	11.5427479700685	4471.42174812928	-4.67463
52.4199968157937	4456.37637318898	-476.642	5.05492755930584	4349.78506607228	-78.2236
5.97038688106989	4523.40391657379	-758.951	26.4289125935361	4442.92310141697	-228.66
96.640662314918	4513.9309027225	-440.261	11.0253144403757	4518.9460277026	-146.908
5.97038688106989	4443.6395478427	-112.092	64.2015602611049	4411.08103805127	-38.0197
98.4715809584461	4526.30950485591	-134.02	32.8371278458844	4434.88298041713	-79.9363
2.98519344053495	4363.87517911161	-341.842	70.3311574590033	4551.06670912275	-95.1472
23.8815475242796	4408.09584461073	-288.183	5.97038688106989	4468.71517274319	-134.282
112.084063047285	4471.74016876294	-140.117	27.0259512816431	4540.67823594969	-119.066
61.2561693997771	4426.52443878363	-583.637	1.27368253462824	4467.28227989174	-24.3545
50.11144722178	4362.95971978984	-752.207	94.0534946664544	4446.30632064958	-8.82915
15.6424136284031	4445.78888711989	-147.331	13.9707053017036	4558.11176564241	-124.523
9.99044738099029	4413.07116701162	-166.185	31.2848272568062	4477.6707530648	-98.4133
41.5140901130393	4555.68380831078	-182.128	80.9982486865149	4502.50756249005	-98.755
44.1808629199172	4562.33083903837	-95.7843	26.2298996975004	4475.64082152523	-125.06
91.6255373348193	4499.68157936634	-220.97	83.6650214933928	4460.59544658494	-52.6378
2.98519344053495	4494.58684922783	-80.9548	18.1897786976596	4619.00971182933	-92.6443
5.7315714058271	4415.93695271454	-126.985	53.733481929629	4521.2147747174	-440.888
35.5835058111766	4502.46775991084	-115.251	11.6621557076899	4521.2147747174	-782.37
28.4190415538927	4500.31842063366	-479.958	85.9337685081993	4453.27177201083	-421.93
16.7170832669957	4483.12370641618	-374.304	66.8683330679828	4508.99538290081	-75.5769
62.4502467759911	4429.03200127368	-373.386	68.6196465530966	4450.8836172584	-331.624
65.7936634293902	4477.86976596083	-177.973	146.951122432734	4544.6584938704	-55.3518
1.43289285145677	4548.79796210794	-899.862	54.5693360929788	4438.90304091705	-35.6929
56.2808469988855	4484.07896831715	-436.481	47.3650692564878	4507.72170036618	-51.9303
58.5495940136921	4450.56519662474	-32.3645	5.89078172265563	4467.28227989174	-164.538
50.11144722178	4486.22830759433	-36.7221	33.911797484477	4512.06018149976	-141.04
5.97038688106989	4399.18006686833	-45.2373	114.512020378921	4463.7000477631	-50.5207
121.477471740169	4463.7000477631	-136.662	113.238337844292	4481.09377487661	-171.416
53.415061295972	4543.78283712785	-402.704	92.3817863397548	4562.17162872154	-301.942
19.2246457570451	4445.55007164464	-440.594	8.04012099984079	4373.98503423022	-35.7693
			17.3539245343098	4583.98344212705	-737.443
