# Supplementary material for: Prolonged nicotine exposure reduces aversion to the drug in mice by altering nicotinic transmission in the interpeduncular nucleus
Source: eLife. 2023 May 30;12:e80767. doi: 10.7554/eLife.80767 (PMC10259488; doi:10.7554/eLife.80767)
Supplement: Figure 3—source data 1. [file elife-80767-fig3-data1.xlsx]

## Sheet: Fig3.A
Nicotine Current	MP Saline	MP Nicotine
	146.426	75.5886
	956.9	565.773
	667.512	740.211
	284.493	538.922
	440.158	55.1625
	832.009	382.651
	537.859	35.9846
	146.317	512.291
	241.708	109.291
	237.017	261.118
	193.235	113.13
	43.0227	102.57
	279.574	41.4233
	1161.96	357.789
	105.075	252.01
	309.851	394.228
	168.032	38.1737
	191.693	230.032
	720.906	264.694
	200.289	113.652
	586.279	49.5341
	491.713	187.219
	385.145	29.912
	295.945	29.5766
		221.969
		68.4071
		188.43
		169.311
		156.133
		90.5254
		298.036
		26.1488
		50.7255
		108.956

## Sheet: Fig3.B
WTmpSalSal	WTmpSalNic	WTmpNicsal	WTmpNicNic
21.7543859649123	12.5187032418953	41.9773095623987	86.03066439523
1.34615384615385	69.0105787181083	8.38206627680312	115.336463223787
-1.92023633677991	139.882049391817	40.3680981595092	173.14390467461
25.7294429708223	108.395061728395	29.6636085626911	18.0470448705278
7.8014184397163	186.567164179104	32.7586206896552	25.6198347107438
10.9530583214794	142.613636363636	22.1052631578947	12.8014842300556
25.4901960784313	135.028248587571	31.2236286919831	171.428571428571
-6.90208667736758	170.983213429257	30.6122448979592	45.2339688041594
18.9189189189189	578.189300411523	-0.755716949651585	402.439024390244
8.8607594936709	494.074074074074	-5.88235294117648	56.9579658687436
2.31729055258467	218.600953895072	7.24637681159422	64.4755244755245
8.29639012032932	99.6974281391831	-8.10014727540501	11.5273775216138
		24.7925655492864	215.254237288136
		9.20372285418823	62.8895184135978
		9.9965168930686	130.543933054393
		-3.52159468438538	14.7739112315066
		-7.61750405186386	13.7387387387387
		26.6932270916335	35.8767424798239
		15.9183673469388	221.052631578947
			58.2978723404255

## Sheet: Fig3.C
	MOUSE MP Sal 1	MOUSE MP Sal 2	MOUSE MP Sal 3	MOUSE MP Sal 4	MOUSE MP Sal 5	MOUSE MP Sal 6	MOUSE MP Sal 7	MOUSE MP Sal 8	MOUSE MP Sal 9	MOUSE MP Sal 10	MOUSE MP Sal 11	MOUSE MP Sal 12	MOUSE MP Sal 13	MOUSE MP Sal 14	MOUSE MP Sal 15	MOUSE MP Sal 16	MOUSE MP Sal 17	MOUSE MP Sal 18	MOUSE MP Sal 19	MOUSE MP Sal 20	MOUSE MP Sal 21	MOUSE MP Sal 22	MOUSE MP Sal 23
0 ug/ml	52.4935530694568	51.2564163200841	42.9082291820343	60.6517992486428	48.2073507063657	49.7715046907475	61.2312774349544	48.5321851461542	43.148239332678	53.832752382669	47.9455815321736	38.7522769346876	51.9771878595093	52.8660401194865	22.6310490088152	39.7882766330783	56.7043972515547	37.1917492399737	28.8999133789272	38.4254782724787	53.0008279074706	49.1562925194347	57.986362920101
100 ug/ml	22.1554486918728	17.3846098965834	74.820726274046	10.6770833333333	8.99395451587237	14.2407924828419	51.9530023082006	11.0246672623866	15.4747699439354	18.707917864654	23.2250034598573	34.2526479585794	19.0081131649157	12.4392603864571	13.8709903697295	38.1099650855149	24.3801349462347	14.0380086206201	17.1896983541805	16.0844769156385	49.5618015866977	6.28138812482825	16.3425431510328
	MOUSE MP Nic 1	MOUSE MP Nic 2	MOUSE MP Nic 3	MOUSE MP Nic 4	MOUSE MP Nic 5	MOUSE MP Nic 6	MOUSE MP Nic 7	MOUSE MP Nic 8	MOUSE MP Nic 9	MOUSE MP Nic 10	MOUSE MP Nic 11	MOUSE MP Nic 12	MOUSE MP Nic 13	MOUSE MP Nic 14	MOUSE MP Nic 15	MOUSE MP Nic 16	MOUSE MP Nic 17	MOUSE MP Nic 18	MOUSE MP Nic 19	MOUSE MP Nic 20	MOUSE MP Nic 21	MOUSE MP Nic 22	MOUSE MP Nic 23	MOUSE MP Nic 24	MOUSE MP Nic 25
0 ug/ml	43.5923517178616	50.3614005921506	30.5607813013723	29.7660655505949	53.9815511481768	47.2566055287668	27.1463206398017	51.2778989847003	26.4359138145701	57.1354607249221	50.5056181633511	38.475131836631	37.734374497273	66.6496770819167	59.1541709457429	50.0684446535733	38.3197327596829	65.4771439947798	52.6224462312073	62.4804622508676	68.448308098426	56.5158791482754	53.4604478585008	57.4762042296752	48.7607620662903
100 ug/ml	4.04159398531637	91.579341265651	5.76684822248587	9.07790661839627	41.7458849155278	25.0047746371276	83.7242100814579	51.8716025892758	44.9058219178082	78.9362177401742	21.0829102138677	26.2945992294472	23.6050846668074	50.864027490319	24.6685844393641	23.6457492334399	22.0698959890204	68.8639706824049	26.5722690490007	18.5380317996769	28.1660416268914	48.3464309249528	87.2170317678372	88.433393665728	35.1102944207898

## Sheet: Fig3.E
	0 ug/ml				100 ug/ml
	0	Side	1		0	Side	1
MOUSE MP Sal 1	0.621410638885732	0.169289939760705	0.579896646594234		0.275843199345586	0.436129389893147	0.795600714421344
MOUSE MP Sal 2	0.697846310798311	0.0292654076993795	0.679603669128656		0.22671390033464	0.481695795495841	0.838872454353626
MOUSE MP Sal 3	0.508600301103626	0.237761110468857	0.632858343266495		0.749658804965555	0.516868042773419	0.256073814322089
MOUSE MP Sal 4	0.628046684971056	0.353405310373589	0.425918599652887		0.150996760565877	0.55611002062067	0.89958788066243
MOUSE MP Sal 5	0.524243092309808	0.294546134483441	0.557390173673016		0.0906044342749284	0.638210986118462	0.910126405062963
MOUSE MP Sal 6	0.564313408405084	0.234061242678099	0.568348070367811		0.184119952659131	0.524201179911479	0.865496566896925
MOUSE MP Sal 7	0.641396593786598	0.328823418909317	0.432162055046442		0.540924619108962	0.349920079169189	0.5035269579617
MOUSE MP Sal 8	0.663104583623395	0.0503354841245526	0.684882461375142		0.130526355642816	0.580442432186377	0.892493016370248
MOUSE MP Sal 9	0.437294308851629	0.434379783734932	0.572941119051918		0.154770790100746	0.605419617425812	0.845256528273933
MOUSE MP Sal 10	0.543755823554139	0.425090198695483	0.46799075631433		0.201643028014665	0.527578597621404	0.816395463886127
MOUSE MP Sal 11	0.487204795801591	0.413961650010343	0.527690138631183		0.242812402860817	0.505837431501311	0.771010890834817
MOUSE MP Sal 12	0.492855179532445	0.225529646555986	0.684003427840978		0.405653855486171	0.323577514033476	0.692460895140807
MOUSE MP Sal 13	0.625670184592752	0.153000878651993	0.593227968573754		0.190577408357649	0.576623006767645	0.81003548396228
MOUSE MP Sal 14	0.658128742903951	0.111753429734126	0.613035594273778		0.156728858816236	0.552112001271138	0.880783019509741
MOUSE MP Sal 15	0.250664878350123	0.478270619910936	0.781160611565879		0.144433290085151	0.584718022996447	0.862230345029813
MOUSE MP Sal 16	0.418422699709474	0.384327827764412	0.615883124440505		0.465090189963699	0.261946600486257	0.673876534010624
MOUSE MP Sal 17	0.590870228249706	0.34056571925538	0.463723712571143		0.310713337485794	0.400147813914982	0.780346127796421
MOUSE MP Sal 18	0.4830436678798	0.230605941643798	0.699640050511188		0.15279536820855	0.568009788382769	0.86173444409144
MOUSE MP Sal 19	0.382679711785314	0.326495836783587	0.753953244063282		0.204261402068489	0.509400842006483	0.835421302871416
MOUSE MP Sal 20	0.476988960810188	0.246285730033084	0.677501958141235		0.160980775484373	0.598710386985371	0.839181310422712
MOUSE MP Sal 21	0.648221066581701	0.130297872906712	0.600144976660561		0.62448114921637	0.120159557078001	0.631459162569239
MOUSE MP Sal 22	0.665603149070854	0.0519212799476574	0.678160527946256		0.0735819149175635	0.635827496642207	0.937969368213254
MOUSE MP Sal 23	0.636374498638453	0.2508854659204	0.49522241883352		0.191583172507084	0.522778615311556	0.842527892100448
	0 ug/ml				100 ug/ml
	0	Side	1		0	Side	1
MOUSE MP Nic 1	0.59441448380699	0.115334395886276	0.693888711683868		0.0428356972227041	0.668749349473428	0.959689021115813
MOUSE MP Nic 2	0.628826188497215	0.123495713760074	0.623052456456857		0.917438542181086	0.609083589548328	0.100531852496292
MOUSE MP Nic 3	0.330180284436099	0.422397523763853	0.705551836651891		0.0579262523242995	0.663497036841554	0.942347327824842
MOUSE MP Nic 4	0.321083195741448	0.430172923697303	0.712582000597575		0.0929924230182064	0.630634945017805	0.909444587850668
MOUSE MP Nic 5	0.668932465000841	0.112242394884901	0.606497831627258		0.568397241450113	0.140946672995989	0.69868285063936
MOUSE MP Nic 6	0.548013478930095	0.224195908634115	0.595975387506673		0.260062952900982	0.496093413885385	0.753350679782681
MOUSE MP Nic 7	0.27312581087674	0.522536157840481	0.729157936095496		0.841754004388905	0.533170268843944	0.184568692566207
MOUSE MP Nic 8	0.687508219929994	0.0439415191688702	0.668662525327466		0.622078367695068	0.157726571444894	0.591227066167175
MOUSE MP Nic 9	0.264861612207877	0.538038559007566	0.735821579820783		0.635064223856754	0.0720425573297938	0.7107672826366
MOUSE MP Nic 10	0.627950381732753	0.249875216752875	0.501609875720035		0.801528240513401	0.462561941962814	0.252434477710604
MOUSE MP Nic 11	0.574191816366128	0.226899802317833	0.565317502572502		0.215731232273683	0.538500525142409	0.790494630153152
MOUSE MP Nic 12	0.399854516457564	0.407767516211264	0.624804767586558		0.263814518935657	0.534099924194378	0.737364303321166
MOUSE MP Nic 13	0.428276450186454	0.32173339260787	0.65477723527842		0.286132933521045	0.429074869548555	0.780877943285128
MOUSE MP Nic 14	0.702036857457331	0.325298597685825	0.39982772238832		0.603137796799509	0.176082090773772	0.588637963541077
MOUSE MP Nic 15	0.645502322364706	0.258395286019335	0.483311317127346		0.246687556630096	0.559687226451262	0.753314716309754
MOUSE MP Nic 16	0.610214352920219	0.151179758908408	0.609091670800361		0.247373570127783	0.502057769033167	0.76699328453968
MOUSE MP Nic 17	0.448342514147172	0.291663212905763	0.659254393082177		0.231641842269804	0.512448407958072	0.782470461621231
MOUSE MP Nic 18	0.673841267187917	0.374321317115344	0.380156774857192		0.728306769987154	0.323593534988309	0.391345547516544
MOUSE MP Nic 19	0.537102726696408	0.393324511119542	0.485829614577549		0.291247654687214	0.44706701902177	0.743895029813205
MOUSE MP Nic 20	0.658903274120236	0.316432645653667	0.429586172530046		0.222219418701488	0.491388810532314	0.82378445849293
MOUSE MP Nic 21	0.684788080632764	0.513824585520388	0.316178040679906		0.337682456866204	0.382227832962985	0.742097439112524
MOUSE MP Nic 22	0.595555429549679	0.318893320311268	0.473675718926563		0.623088915137595	0.108203461539988	0.649084877091039
MOUSE MP Nic 23	0.650169059760039	0.134503518102066	0.59456778343536		0.874423269720296	0.574209217655344	0.142391780913048
MOUSE MP Nic 24	0.61251962084898	0.297808538475149	0.475032842371424		0.886798213963928	0.579665690875827	0.13320359970756
MOUSE MP Nic 25	0.621384026179735	0.115495478730434	0.641017056454453		0.482599944046846	0.225158636326204	0.728489408006887

## Sheet: Supp 1A
MP sal ML	MP sal DV	MP Sal Current	MP Nic ML	MP Nic DV	MP Nic Current
93.8146791912116	4488.77567266359	956.9	36.8173857665977	4426.52443878363	75.5886
29.8519344053495	4515.20458525713	667.512	109.9347237701	4506.64703072759	565.773
72.918325107467	4434.48495462506	284.493	56.2410444196784	4402.72249641777	740.211
118.293265403598	4471.30234039166	440.158	37.8522528259831	4432.57443082312	538.922
52.5394045534151	4414.86228307594	832.009	73.833784429231	4402.72249641777	55.1625
73.833784429231	4390.42349944276	537.859	50.7880910683012	4485.11383537653	382.651
61.4153797166056	4357.38735870084	146.317	48.4795414742875	4343.57586371597	35.9846
49.7134214297087	4455.26190097118	241.708	73.833784429231	4514.96576978188	109.291
53.2558509791435	4640.38369686356	237.017	61.4153797166056	4518.9858302818	261.118
18.3887915936953	4488.77567266359	193.235	37.8522528259831	4462.42636522847	113.13
29.8519344053495	4425.40996656583	43.0227	32.9963381627129	4514.96576978188	102.57
6.96545136124821	4404.63302021971	279.574	65.2762298996975	4472.85464098074	41.4233
11.4631428116542	4388.83139627448	1161.96	20.9361566629518	4518.9858302818	357.789
39.4841585734756	4391.37876134374	309.851	112.243273364114	4437.23133259035	252.01
3.22400891577774	4467.6405031046	168.032	53.2558509791435	4509.4730138513	394.228
22.7670753064799	4467.6405031046	191.693	2.66677280687789	4459.48097436714	230.032
61.4551822958128	4558.15156822162	720.906	82.3913389587645	4489.33290877249	264.694
124.383060022289	4437.78856869925	200.289	108.860054131508	4543.02658812291	113.652
59.6640662314918	4501.15427479701	586.279	8.27893647508358	4408.21525234835	49.5341
79.7245661518867	4464.33688903041	491.713	108.860054131508	4543.02658812291	187.219
48.4795414742875	4518.62760706894	385.145	8.27893647508358	4408.21525234835	29.912
29.8121318261423	4518.62760706894	295.945	75.9831237064162	4436.31587326859	29.5766
			11.9009711829327	4360.57156503742	68.4071
			47.2854640980736	4518.9858302818	188.43
			147.150135328769	4497.49243750995	169.311
			9.31380353446903	4548.83776468715	156.133
			8.27893647508358	4426.52443878363	90.5254
			10.5874860690973	4396.67250437828	298.036
			66.5897150135329	4497.49243750995	26.1488
			41.7529055882821	4443.0823117338	50.7255

## Sheet: Sup. 1C
Mpnic LM	Mpnic DV	Mpsal LM	Mpsal DV
376.941176470588	4707.45098039216	77.5294117647059	4399.05882352941
81.3333333333333	4361.25490196078	63.5686274509804	4649.64705882353
57.3725490196078	4363.88235294118	142.549019607843	4388.58823529412
53.6078431372549	4816.3137254902	19.3725490196078	4314.43137254902
8.15686274509804	4625.25490196078	80.7843137254902	4450.90196078431
11.921568627451	4345.17647058824	310.392156862745	4525.52941176471
66.9803921568627	4546.47058823529	129.882352941176	4388.90196078431
304.745098039216	4673.72549019608	154.392156862745	4447.09803921569
74.1960784313726	4822.27450980392	92.8627450980392	4432.54901960784
196.274509803922	4409.33333333333	248.313725490196	4639.29411764706
14.9803921568627	4373.05882352941	192.509803921569	4466.94117647059
190.078431372549	4625.25490196078
285.607843137255	4379.45098039216
75.6470588235294	4438.27450980392
109.803921568627	4379.45098039216
209.647058823529	4302.62745098039
129.803921568627	4348.3137254902
122.196078431373	4474.54901960784

## Sheet: Sup. 1D
Mpnic LM	MpnicNicEvoked	Mpsal LM	MpsalNicEvoked		Mpnic DV	MpnicNicEvoked	Mpsal DV	MpsalNicEvoked
376.941176470588	7.95	77.5294117647059	1.06666666666667		4707.45098039216	7.95	4399.05882352941	1.06666666666667
81.3333333333333	4.06666666666667	63.5686274509804	4.58888888888889		4361.25490196078	4.06666666666667	4649.64705882353	4.58888888888889
57.3725490196078	0.316666666666667	142.549019607843	15.9777777777778		4363.88235294118	0.316666666666667	4388.58823529412	15.9777777777778
53.6078431372549	2.26111111111111	19.3725490196078	1.85555555555556		4816.3137254902	2.26111111111111	4314.43137254902	1.85555555555556
8.15686274509804	0.583333333333333	80.7843137254902	3.14444444444444		4625.25490196078	0.583333333333333	4450.90196078431	3.14444444444444
11.921568627451	2.06111111111111	310.392156862745	16.8777777777778		4345.17647058824	2.06111111111111	4525.52941176471	16.8777777777778
66.9803921568627	1.36111111111111	129.882352941176	6.98888888888889		4546.47058823529	1.36111111111111	4388.90196078431	6.98888888888889
304.745098039216	20.5444444444444	154.392156862745	5.89444444444444		4673.72549019608	20.5444444444444	4447.09803921569	5.89444444444444
74.1960784313726	1.9	92.8627450980392	5.85555555555556		4822.27450980392	1.9	4432.54901960784	5.85555555555556
196.274509803922	0.711111111111111	248.313725490196	5.56111111111111		4409.33333333333	0.711111111111111	4639.29411764706	5.56111111111111
14.9803921568627	6.27777777777778	192.509803921569	5.75		4373.05882352941	6.27777777777778	4466.94117647059	5.75
190.078431372549	7.45				4625.25490196078	7.45
285.607843137255	5.24444444444444				4379.45098039216	5.24444444444444
75.6470588235294	2.87777777777778				4438.27450980392	2.87777777777778
109.803921568627	1.12222222222222				4379.45098039216	1.12222222222222
209.647058823529	1.81666666666667				4302.62745098039	1.81666666666667
129.803921568627	6.35555555555556				4348.3137254902	6.35555555555556
122.196078431373	1.14444444444444				4474.54901960784	1.14444444444444

## Sheet: Sup 1E
Mpnic LM	MpnicSpont	Mpsal LM	MpsalSpont		Mpnic DV	MpnicSpont	Mpsal DV	MpsalSpont
376.941176470588	3.95625	77.5294117647059	8.7		4707.45098039216	3.95625	4399.05882352941	8.7
81.3333333333333	3.5	63.5686274509804	6.77916666666667		4361.25490196078	3.5	4649.64705882353	6.77916666666667
57.3725490196078	1.44285714285714	142.549019607843	11.2291666666667		4363.88235294118	1.44285714285714	4388.58823529412	11.2291666666667
53.6078431372549	18.95	19.3725490196078	2.6375		4816.3137254902	18.95	4314.43137254902	2.6375
8.15686274509804	0.854761904761905	80.7843137254902	1.69375		4625.25490196078	0.854761904761905	4450.90196078431	1.69375
11.921568627451	6.52291666666667	310.392156862745	9.75625		4345.17647058824	6.52291666666667	4525.52941176471	9.75625
66.9803921568627	0.592857142857143	129.882352941176	5.30625		4546.47058823529	0.592857142857143	4388.90196078431	5.30625
304.745098039216	41.1666666666667	154.392156862745	4.94166666666667		4673.72549019608	41.1666666666667	4447.09803921569	4.94166666666667
74.1960784313726	2.50208333333333	92.8627450980392	0.847916666666667		4822.27450980392	2.50208333333333	4432.54901960784	0.847916666666667
196.274509803922	5.79791666666667	248.313725490196	1.775		4409.33333333333	5.79791666666667	4639.29411764706	1.775
14.9803921568627	2.84375	192.509803921569	2.6875		4373.05882352941	2.84375	4466.94117647059	2.6875
190.078431372549	13.3270833333333				4625.25490196078	13.3270833333333
285.607843137255	4.20625				4379.45098039216	4.20625
75.6470588235294	20.7958333333333				4438.27450980392	20.7958333333333
109.803921568627	8.27916666666667				4379.45098039216	8.27916666666667
209.647058823529	14.4229166666667				4302.62745098039	14.4229166666667
129.803921568627	2.25416666666667				4348.3137254902	2.25416666666667
122.196078431373	2.32291666666667				4474.54901960784	2.32291666666667

## Sheet: Sup. 1F-G
MpsalSpont	MpnicSpont	MpsalNicEvoked	MpnicNicEvoked
8.7	3.95625	1.06666666666667	7.95
6.77916666666667	3.5	4.58888888888889	4.06666666666667
11.2291666666667	1.44285714285714	15.9777777777778	0.316666666666667
2.6375	18.95	1.85555555555556	2.26111111111111
1.69375	0.854761904761905	3.14444444444444	0.583333333333333
9.75625	6.52291666666667	16.8777777777778	2.06111111111111
5.30625	0.592857142857143	6.98888888888889	1.36111111111111
4.94166666666667	41.1666666666667	5.89444444444444	20.5444444444444
0.847916666666667	2.50208333333333	5.85555555555556	1.9
1.775	5.79791666666667	5.56111111111111	0.711111111111111
2.6875	2.84375	5.75	6.27777777777778
	13.3270833333333		7.45
	4.20625		5.24444444444444
	20.7958333333333		2.87777777777778
	8.27916666666667		1.12222222222222
	14.4229166666667		1.81666666666667
	2.25416666666667		6.35555555555556
	2.32291666666667		1.14444444444444

## Sheet: Sup. 1H
WTmpsalsal	WTmpsalNic	WTmpNicsal	WTmpNicNic
-6.01092896174862	-97.2602739726027	-21.4626391096979	-25.0440917107584
-12.258064516129	-84.180790960452	-59.8587997982854	-15.2238805970149
-9.71527178602243	-28.812230497844	-34.0926347760061	-67.8646934460888
-6.60980810234541	-71.2062256809339	-18.6932849364791	-19.634703196347
-7.67481523592951	-76.8851303735025	-4.71258415328845	-53.9156626506024
-22.001282873637	-45.8695652173913	-15.0537634408602	-63.1205673758865
-10.2143757881463	-55.678059536935	-19.9402539208364	-35.5855855855856
-6.30966239813739	-35.1691581431943	-31.0580204778157	-50.2145922746781
-10.6206896551724	-70.5950991831972	-3.4074074074074	-17.5500588928151
	-40.536756126021	-2.81958872164512	-86.9360902255639
	-64.5161290322581	-10.3400416377516	-34.1669482933423
	-86.0072376357057	-31.6239316239316	-70.0197238658777
		-3.07017543859649	-31.239092495637
