# Supplementary material for: Prolonged nicotine exposure reduces aversion to the drug in mice by altering nicotinic transmission in the interpeduncular nucleus
Source: eLife. 2023 May 30;12:e80767. doi: 10.7554/eLife.80767 (PMC10259488; doi:10.7554/eLife.80767)
Supplement: Figure 4—source data 1. [file elife-80767-fig4-data1.xlsx]

## Sheet: Fig4.A and Supp 1A
Preference (%)
	WT 1	WT 2	WT 3	WT 4	WT 5	WT 6	WT 7	WT 8	WT 9	WT 10	WT 11	WT 12	WT 13	WT 14	WT 15	WT 16	WT 17	WT 18	WT 19	WT 20	WT 21	WT 22	WT 23	WT 24	WT 25	WT 26	WT 27	WT 28	WT 29	WT 30	WT 31	WT 32	WT 33	WT 34	WT 35
0 ug/ml	38.0567443022619	47.0174750497635	50.3166607220232	51.2099161242268	55.765916062137	29.7793342753961	52.6623219164567	48.1898962487747	46.93788579858	47.8509771478521	28.9621403275529	64.5238992131257	33.7778128582436	33.2496144834781	67.1294246906662	62.4823886732642	40.4699253340246	57.4495531627982	52.1965825632552	53.1762054810774	42.0715289582497	62.3783604097924	68.2587987429386	64.0592380142518	44.8349769851259	32.6497374058124	47.9127258960437	74.1550444972819	57.8434920171195	54.2743852188493	23.107195163037	37.543852642737	57.9170130578411	42.9833024902029	36.4194040424484
10 ug/ml	46.5795837793576	60.4425488259008	92.9838357885806	87.5214593895888	71.2233455315305	67.7229407972231	13.2178308475822	6.29462861739896	47.1614912172817	31.6186523916545	11.8453257812466	71.737756026494	45.6000219381777	42.1947187329117	24.8490858304852	9.27844741863037	19.6779173143689	53.4718586790412	58.2413706085054	64.7779676224257	46.9905680106319	54.2578640475516	40.5825140388393	93.3226716918703	21.4012745289164	31.438541730744	25.6418317785425	37.912031041501	87.3221383490846	51.338491739675	39.4916183571589	34.6749949580385	80.8019140553673	17.1160735917622	10.6632929317326
50 ug/ml	26.182331619536	5.7543243052108	54.6666666666667	92.904883501145	95.3657174762702	91.52895742558	8.23794104208646	4.11542965890792	55.3987248484974	39.7052458401324	3.61799908958656	35.6138990767316	25.7909036388257	40.2140330663675	18.532137148015	3.04634735761167	9.08881387947777	53.4212025198419	49.0670967519766	55.2962235516716	49.3956257712345	54.0672523636849	48.1658388258618	96.1084665969892	5.16948223883124	7.57347126885609	2.05323952897435	39.7785859491849	93.4046358824194	49.4291182764637	51.7742213805413	61.7052635127811	21.3583697177939	3.55069564394855	3.38693642265071
100 ug/ml	81.7979670982254	9.01020333678253	58.4967320261438	94.4319100215517	85.5792929652387	6.90730370962929	4.72804084384246	2.82808862459821	48.0897117556703	28.6520704014217	7.4427829115149	52.8738445636631	27.1435503330372	39.2517156475275	10.7277597508233	3.68711796781316	13.0705409609908	48.5243473640665	43.5144929757137	58.7648312910035	49.3109462441816	39.2593141757691	17.0533067727274	96.0138687347663	41.0982902726473	7.82296501888858	3.51352703005157	17.480433631122	89.477643594883	44.2488733499366	48.026813547965	2.65436772540636	5.635908341936	3.59555495893441	3.89941538109635
200 ug/ml	7.67060936335035	1.41138535599214	48.2590144919577	10.3579245277514	83.4153084769306	4.97575674334412	2.11042789444566	3.93582661005564	2.18252685996897	22.8992671019392	15.25527	34.6277832039897	12.6366695808309	49.697512088038	7.52659712093396	1.79630124477171	9.28236335990635	8.12661925583141	22.5303801974607	50.4205467029937	2.66488839408385	11.3564261892265	9.52248964040712	96.269916339364	31.9193908184318	6.81059591910944	3.62443772902904	25.456534117689	92.1192458184201	43.7202502447536	55.0262327554007	13.3902804034992	6.25848907254371	3.77037882252788	2.65704547817142
	B4 -/- 1	B4 -/- 2	B4 -/- 3	B4 -/- 4	B4 -/- 5	B4 -/- 6	B4 -/- 7	B4 -/- 8	B4 -/- 9	B4 -/- 10	B4 -/- 11	B4 -/- 12	B4 -/- 13
0 ug/ml	33.5283216048306	61.3638659611253	70.1847125441997	60.132015919836	52.8793366875454	44.5242841568955	32.7782540201196	74.3779538504309	39.0765852901273	24.166346052243	24.1306700000336	52.4540005833341	38.0643264892633
10 ug/ml	41.7523341226492	58.5861369623664	61.0470672880282	60.3895794597474	43.7354169153751	20.2383153515267	41.7361195657545	80.8917704029501	43.2869511973959	74.689890973547	56.5917207350136	45.0878281454885	54.9761730061516
50 ug/ml	57.984410768022	71.4301194600836	73.8929919626641	65.851192040525	44.7817726374245	34.5408525841069	32.9559614009712	52.9589557307126	34.7972114018848	44.8141406964033	50.7763883906456	53.4601915394597	95.5087066558668
100 ug/ml	54.1205903824064	67.6896500757727	55.4871303670712	39.6252214829643	42.6007445948074	28.809285096453	27.6823519369993	40.7169676771975	27.2591392954524	54.1295388775066	54.0811560789147	52.7465850711838	97.0651871799492
200 ug/ml	37.26834501594	60.6927087626589	38.1001566392924	35.9807854153963	30.5924893326315	27.2526429058935	41.2410788525499	52.0843742048117	21.6960247879104	53.2387626568728	51.102922335434	47.9960442223336	95.8128434499772
Nicotine intake (mg/kg/d)
	WT 1	WT 2	WT 3	WT 4	WT 5	WT 6	WT 7	WT 8	WT 9	WT 10	WT 11	WT 12	WT 13	WT 14	WT 15	WT 16	WT 17	WT 18	WT 19	WT 20	WT 21	WT 22	WT 23	WT 24	WT 25	WT 26	WT 27	WT 28	WT 29	WT 30	WT 31	WT 32	WT 33	WT 34	WT 35
0 ug/ml	0	0	0	0	0	0	0	0	0	0	0	0	0	0	0	0	0	0	0	0	0	0	0	0	0	0	0	0	0	0	0	0	0	0	0
10 ug/ml	1.03229166666667	1.272375	1.55072463768116	1.998	1.93333333333333	1.26346153846154	0.215	0.13125	1.10673076923077	0.7875	0.250997150997151	1.4039886039886	0.949038461538461	1.02923789173789	0.520916666666667	0.206521739130435	0.41852766798419	1.19791666666667	1.52931034482759	1.16869230769231	1.14464285714286	1.295	0.890384615384615	2.01538461538462	0.423	0.817391304347826	0.5375	0.846	1.976	1.22	0.836	0.825846153846154	2.1195652173913	0.311458333333333	0.239583333333333
50 ug/ml	2.881875	0.770833333333334	6.29861111111111	8.28365384615385	9.64102564102564	12.435625	0.762884615384615	0.505	6.30173076923077	4.96153846153846	0.394230769230769	3.68634615384615	2.63461538461538	4.83333333333333	2.245	0.333333333333333	0.947916666666667	7.13673076923077	6.225	5.35826923076923	5.75892857142857	6.82	5.41666666666667	8.85096153846154	0.584807692307692	0.915833333333333	0.222826086956522	5.015	9.87019230769231	5.14423076923077	5.07211538461538	6.335	2.32291666666667	0.333333333333333	0.373541666666667
100 ug/ml	18.9991666666667	2.61458333333333	13.6388888888889	17.0192307692308	17.2307692307692	1.90384615384615	0.796410256410256	0.645833333333333	10.1942307692308	6.43269230769231	1.625	11.0053846153846	4.90384615384615	9.64423076923077	2.95192307692308	1.32541666666667	3.35416666666667	13.5947293447293	10.7083333333333	10.0576923076923	11.5320197044335	10.5	3.87037037037037	17.656339031339	7.96153846153846	2.33333333333333	0.682971014492754	4.65	19.3942307692308	9.32692307692307	10.4326923076923	0.509615384615384	1.32291666666667	0.822916666666667	0.85
200 ug/ml	3.5	0.6875	18.7083333333333	4.59615384615384	31.8461538461538	2.21153846153846	0.621082621082621	1.92	1.11538461538462	9.36538461538462	3.980769	13.1153846153846	5.55769230769231	31.28	3.54692307692308	1.02083333333333	4.64	4.88161375661375	12.9833333333333	15.5384615384615	1.21428571428571	5.64	4.09259259259259	36.9230769230769	11.6176923076923	3.78	1.54166666666667	11.8523076923077	45.4238461538462	17.5769230769231	25.2692307692308	4.74846153846154	2.95833333333333	1.8125	1.16
	B4 -/- 1	B4 -/- 2	B4 -/- 3	B4 -/- 4	B4 -/- 5	B4 -/- 6	B4 -/- 7	B4 -/- 8	B4 -/- 9	B4 -/- 10	B4 -/- 11	B4 -/- 12	B4 -/- 13
0 ug/ml	0	0	0	0	0	0	0	0	0	0	0	0	0
10 ug/ml	0.995	1.255	1.03730158730159	1.321875	0.944565217391304	0.582291666666667	1.31628787878788	1.74545454545455	0.997186147186147	2.55833333333333	1.15432692307692	0.973958333333333	0.972115384615385
50 ug/ml	7.47326923076923	8.515	8.05357142857143	7.02666666666667	4.80978260869565	6.87005928853755	5.85119047619048	5.57954545454545	4.65909090909091	5.8125	5.31730769230769	5.83740942028985	8.3735754985755
100 ug/ml	12.4230769230769	14.93	11.2767857142857	9.01291666666667	9.17391304347826	9.39583333333333	7.54545454545455	8.92391304347826	6.06818181818182	12.9318181818182	13.3653846153846	14.4583333333333	17.6805555555556
200 ug/ml	15.1923076923077	24.3	14.5172413793103	12.92	12.2826086956522	12.3396739130435	18.5909090909091	20.9841897233202	10.6086956521739	19.5454545454545	23.462962962963	23.2425	29.6923076923077

## Sheet: Fig4.C
	0 ug/ml				10 ug/ml				50 ug/ml				100 ug/ml				200 ug/ml
	0	Side	1		0	Side	1		0	Side	1		0	Side	1		0	Side	1
WT 1	0.389692162398552	0.432963010795657	0.625080071182582		0.466589225859413	0.474037390603814	0.534896092807692		0.298127966446165	0.429508722762192	0.75182022584299		0.821809146754689	0.527396537146708	0.198521867120884		0.0794877254778455	0.639349804193151	0.92352916100935
WT 2	0.61724117957879	0.104445980478666	0.663805071366998		0.685785246644864	0.204654029536044	0.511322234992516		0.0607230881126283	0.653262245893534	0.942656250881369		0.0942869874281547	0.625307317481804	0.910321904197975		0.0142096316636201	0.696017967645717	0.985887522241849
WT 3	0.589363036185336	0.193151141339845	0.58396538765678		0.74413771185518	0.398727221764897	0.32404648532129		0.621753863228819	0.258026871546281	0.49915671980759		0.657909120605324	0.235358090116984	0.495911695775955		0.583479960905721	0.172921918155396	0.612591686965623
WT 4	0.529413127830316	0.36591416507868	0.506043414574819		0.876189533512385	0.592597196390763	0.13144927099408		0.929054796470954	0.656327483551739	0.0710291828953872		0.944417822304755	0.658749485886571	0.0573308176796895		0.106487281778662	0.618905716848348	0.896761423470914
WT 5	0.587870873945247	0.319217177248396	0.47986856866272		0.776634487265224	0.433480761831845	0.28417756734603		0.854007330360974	0.54666512433685	0.169920839912585		0.859738870740912	0.548709129781086	0.166027306663946		0.834487564287146	0.581886343861166	0.167521119299274
WT 6	0.401667356694919	0.306587576352789	0.75216353270174		0.692666727048843	0.396403714511728	0.354017483771769		0.915304388477036	0.645975986858955	0.084870342604		0.071019354483951	0.647655898703726	0.931073399103815		0.0529743121178727	0.659446806229206	0.950416299774725
WT 7	0.624704547089684	0.16610614278914	0.580525049266088		0.165523116721016	0.54367847235723	0.873522343856982		0.0832176190129224	0.642467286761331	0.917696219493385		0.0596978781293904	0.652199957467378	0.94527440350893		0.021497833162222	0.689393369447827	0.978904284872509
WT 8	0.650245702932676	0.0659627562818921	0.677511290833531		0.0793555476774061	0.628512907908057	0.938298849300798		0.0450913665366828	0.665170587808315	0.959022751637304		0.0282930646253564	0.686796595542654	0.971719468269485		0.0399137342542898	0.674980813132819	0.960664652197118
WT 9	0.508830626650465	0.305091858481222	0.565818778979547		0.599472957093101	0.133000506041349	0.645087592455716		0.634752223547223	0.197663173890851	0.54308000177524		0.643295076563532	0.0751891251355276	0.672334976345479		0.039989527515595	0.669186937752811	0.964542323523362
WT 10	0.479267938465076	0.473540614819385	0.522185995487739		0.32376528488709	0.467969223721034	0.687350646951705		0.409318963314784	0.413562865502004	0.611094998282953		0.286699987587924	0.534358186590038	0.713551311998291		0.25109752751796	0.519911432369381	0.754523272408908
WT 11	0.360965986628154	0.353880737008093	0.742329870712056		0.138977399202236	0.57286427223769	0.884538411751625		0.0361886476183632	0.681423602059447	0.963820334100041		0.074520507763881	0.65376605831563	0.92557962804239		0.157708094435882	0.576476590331008	0.848390469947617
WT 12	0.645744339407319	0.49619022290957	0.355679304450062		0.72594840403006	0.445421911937747	0.303720208059838		0.365544594627476	0.441695969695186	0.649110829617512		0.540414279031673	0.389333643477517	0.484324995956291		0.400383785482544	0.440758644293771	0.610471341983807
WT 13	0.368561438690803	0.388075680898246	0.678440326723701		0.517630981228846	0.25880715163132	0.596608241616208		0.310734745818489	0.406607164278854	0.762061683515428		0.308470371686109	0.42091451508352	0.743157428508538		0.122993535090627	0.616324702790332	0.877787186553249
WT 14	0.633873438069883	0.0795478557033116	0.681725777851388		0.507703743719842	0.231218758915619	0.643326291028828		0.437811363047402	0.393078030210849	0.588729016833507		0.402332788769868	0.425471317064007	0.613870800713626		0.259727955242221	0.473863667282176	0.770005373921274
WT 15	0.693681061709995	0.367549012512355	0.372296819166886		0.251458022831613	0.525571070091036	0.752495462203381		0.190677098956233	0.553318724257305	0.815913606398414		0.110475506818432	0.615254993469731	0.89311233481031		0.0767926194359059	0.644511438748089	0.924859537433198
WT 16	0.634532564050313	0.408941737600564	0.391131437466971		0.114607887940184	0.59420103643313	0.90970655686628		0.0372467233654273	0.670442146464386	0.969773360764889		0.0449664486662998	0.662881416853184	0.963472688844575		0.0183022162794623	0.692000460339759	0.982043250689758
WT 17	0.41812288260826	0.406240154355545	0.604506607308927		0.236792033103781	0.477051231821966	0.813948475429523		0.0953293653606495	0.624052360042989	0.909566605758209		0.155151700357423	0.556571207431804	0.873304775495922		0.0943232149330358	0.631918400329288	0.907331032025895
WT 18	0.652079286859811	0.205494581884614	0.525562872638122		0.670957172996987	0.100873501256323	0.617046476705997		0.586194466184026	0.260919993650864	0.524594988336657		0.573673557126017	0.194553700063849	0.598844222535617		0.0818502296049648	0.644726946463075	0.918785652353016
WT 19	0.587456620397746	0.231494944369008	0.548792884050109		0.654771062864704	0.217056393385188	0.513709774673274		0.5279120466138	0.305378235104062	0.545297344501546		0.483524499558179	0.296363936054767	0.602914655783647		0.247563721744481	0.483102195765119	0.781460294816548
WT 20	0.53456497475732	0.446461051880549	0.471418712627899		0.664892414668683	0.380031905624399	0.382782667626733		0.627988034982824	0.209156151001263	0.537070294326689		0.681360863588758	0.17819510484618	0.537546277645328		0.623354638475502	0.133531313945339	0.616571221554372
WT 21	0.533269442665535	0.189683545446246	0.665541673613168		0.619141667908799	0.101423663662965	0.665976759901012		0.646575213790876	0.0830072720177371	0.655855922946516		0.648374019676952	0.0793106682430478	0.658915733996706		0.0343349251996459	0.672963570199544	0.973591864801051
WT 22	0.663491631766843	0.300584296408502	0.438923612065676		0.617565390820749	0.209424193787283	0.54426990637785		0.637540036641525	0.167190566320476	0.570186154731224		0.393340413377889	0.487738808456417	0.607890119413785		0.144175490345255	0.564267804807518	0.890874877988916
WT 23	0.696153866590845	0.406546695750298	0.345621514247322		0.52722613665069	0.188629763438578	0.682874159996426		0.484999972488068	0.443544808986726	0.521448172684679		0.189268869863205	0.532151257468619	0.833520587415061		0.114727639227885	0.594935357950002	0.907035081126778
WT 24	0.657537352156702	0.378747807430922	0.388806647572043		0.933333003197088	0.650998226245495	0.0682426627520498		0.961139843864919	0.67261161232565	0.0402550310507458		0.9601492936835	0.67619152113019	0.0401159751918876		0.962772498960844	0.672568752572601	0.0391478986413012
WT 25	0.455537256862065	0.422566516217479	0.557507535991126		0.231769599661177	0.500733687945473	0.791006736222123		0.051820552710507	0.668866887742768	0.948312039840578		0.517659445928218	0.205532220330499	0.667836429453923		0.397948157497861	0.318618666641675	0.72109286481514
WT 26	0.353770273310245	0.403047277742174	0.687138019732395		0.322238508445427	0.467702190505775	0.689250913463489		0.0836669123600824	0.629052429677401	0.924949040135049		0.0847459434353428	0.629574406227127	0.922346233553851		0.0687515126393269	0.653621760943408	0.931941442424365
WT 27	0.482608460619465	0.442630542835635	0.524076719899497		0.329433564171782	0.381161737553079	0.771809456816948		0.0206320552942984	0.691279853614651	0.979469698932121		0.0356927266765564	0.678126175003803	0.964885190132264		0.0362636995134843	0.681092528860635	0.96375634956239
WT 28	0.742713925049422	0.518186644461819	0.261769143553401		0.412270680364779	0.35899147568199	0.641659172036384		0.411286097797445	0.408483590918047	0.611215620920926		0.196727820296676	0.523112127509857	0.83011635489023		0.255153013787942	0.54150741287006	0.745635553129871
WT 29	0.590244432018441	0.390478738063611	0.43762843736026		0.878556111422658	0.549516688946899	0.159430467403222		0.934570961386996	0.638801281013406	0.0730079736701889		0.894783340636353	0.634307205189951	0.10528226243148		0.921685936036146	0.63099597513134	0.0843803787525527
WT 30	0.641171485340645	0.164292838240736	0.570625244128704		0.645837980209514	0.108979939095195	0.624769446986331		0.627704558276909	0.113247047068469	0.636734361372413		0.57939898964194	0.138467088339766	0.671361096727662		0.529319077401808	0.211170017483108	0.637003674091782
WT 31	0.237379882600567	0.520497546959725	0.770847134912441		0.487537603948393	0.238505614927954	0.669223840071887		0.606446819387971	0.185066514713004	0.576448885101672		0.590604548422088	0.157502253957605	0.623119139216216		0.605620923663317	0.252102627179005	0.515996170597025
WT 32	0.403287428787152	0.374083280216605	0.641688162087327		0.393714582226879	0.348968382569284	0.67934621004118		0.694128316127037	0.216476026122723	0.49770357542792		0.0324399411321393	0.675173853251616	0.973634939426749		0.148822625445294	0.568592647799623	0.868528966571897
WT 33	0.58045794248582	0.468099327639695	0.42260047543519		0.808043831792691	0.581892467120546	0.192084754707051		0.265980407886948	0.445696154252861	0.80223324726904		0.0624150602871435	0.648626941548041	0.944021966329136		0.0629031369105067	0.659585031248814	0.937436410207278
WT 34	0.551547026480486	0.16958491001501	0.666736884097024		0.214760810538642	0.495222772941342	0.838928324654717		0.0355101545276219	0.682112486778522	0.964493161300589		0.0362176379280871	0.678974921145805	0.964054260982442		0.0383341618857006	0.675901178094919	0.962321116632552
WT 35	0.430185110503508	0.303161392229501	0.675774480466633		0.122685190278559	0.589700660542009	0.895424925540402		0.0340202640845144	0.681239536128095	0.966135937596447		0.0391883765022437	0.677233197944663	0.96101374663995		0.0266067318197976	0.687567116037381	0.973430536101422
	0 ug/ml				10 ug/ml				50 ug/ml				100 ug/ml				200 ug/ml
	0	Side	1		0	Side	1		0	Side	1		0	Side	1		0	Side	1
B4 -/- 1	0.338593584236195	0.481800022858944	0.666392664417385		0.424988058682625	0.428704563189822	0.587850463612851		0.589678662784952	0.400787562509777	0.433627386108637		0.548254303086	0.414424004843319	0.467087757497655		0.372688316934892	0.514109440438912	0.627319441162923
B4 -/- 2	0.622270985589458	0.412665430925433	0.399929819198282		0.586640264589131	0.477561839930991	0.415239763016355		0.717236537870168	0.485081229957763	0.292960512790229		0.680624369535134	0.463912403381166	0.330842154039723		0.608970218716839	0.46268295084861	0.396220332682279
B4 -/- 3	0.711604161396902	0.432548106032892	0.320446924830609		0.633867337691415	0.347405750353243	0.425260456698525		0.752701375864619	0.429307421356026	0.297824649710547		0.555588408204289	0.474961166330007	0.446022277458819		0.381877389025188	0.488856053375541	0.619537898326524
B4 -/- 4	0.662380008096873	0.24422901703283	0.48590838306176		0.603972714562242	0.501246748940265	0.396221466784342		0.662102825498685	0.459352350232217	0.34836232678469		0.406125082317556	0.423888041262414	0.610273014992598		0.440124105229131	0.283602533529408	0.688544493621012
B4 -/- 5	0.606335029580044	0.205347477148493	0.556826215569027		0.495721896601355	0.273890650323229	0.609123846571895		0.600034072930898	0.113350938385118	0.681472989875279		0.515463745635423	0.222458294501958	0.643185806099879		0.32800914433279	0.428186507880514	0.704088213303773
B4 -/- 6	0.53419764603241	0.212021822642187	0.628395927651237		0.220430025986342	0.508776733128031	0.802385873084643		0.372914365795518	0.391271236265711	0.669513310199683		0.297991933135874	0.473853817677577	0.715970313829418		0.308572956369289	0.421854698092866	0.741730686492485
B4 -/- 7	0.329608494920956	0.496198465756711	0.673109708384647		0.487937037448311	0.260676662199924	0.635106417223716		0.359314130582473	0.3954477576825	0.685556282457402		0.277645012822003	0.528129689502481	0.72349133678638		0.413479245472093	0.478381238306273	0.588339620784775
B4 -/- 8	0.775933055168321	0.370459581899968	0.338397738015824		0.830809559851317	0.438021286831685	0.269089421347879		0.53050103429105	0.469848121572875	0.471436350708791		0.415945637868439	0.425263645264505	0.598891826724855		0.527182095122744	0.419015637142327	0.486038555386064
B4 -/- 9	0.392691002717202	0.473923934102536	0.610470734607724		0.458201760319366	0.356141462751165	0.586693982593863		0.354819430948472	0.456677599121158	0.655707709685421		0.273233910599805	0.53229533840933	0.727649629968033		0.239633323383606	0.488586976007494	0.789622462900887
B4 -/- 10	0.241813511072086	0.555241317363793	0.758384370284719		0.747854339090047	0.524019637501674	0.255906805350836		0.559367474434261	0.173190806542665	0.645452676442586		0.645172443156122	0.154553809501869	0.577630248392436		0.673625018154936	0.0930996406777396	0.623694967068665
B4 -/- 11	0.241426099668795	0.556226467535652	0.758731284184734		0.58160784160866	0.371707260889125	0.454349278331564		0.587467890998149	0.204691102514483	0.574099952221652		0.542275440922969	0.461987700808346	0.460911631714699		0.534730887326661	0.342740993058165	0.513691225496871
B4 -/- 12	0.571016639440449	0.275445642200444	0.526288885357824		0.544136411085574	0.201460602502523	0.627955309683196		0.597806110846238	0.235029869700728	0.536813110286915		0.586662388830629	0.244733838722861	0.537811358233336		0.609194399162307	0.126424000018737	0.641246389092409
B4 -/- 13	0.461527847651224	0.267150096168929	0.672102242499089		0.63806446946341	0.18302976141942	0.554619515585768		0.95513760241161	0.668861389855061	0.0459750630588261		0.970654645793433	0.684980271360285	0.0294397316799836		0.958225638009715	0.668146413376647	0.044039804036608

## Sheet: Fig4.D
Nicotine Current (-pA)	WT	B4 -/-	B4 -/- MP Saline	B4 -/- MP Nicotine
	263.671	77.2895	53.6503	64.0196
	449.724	4.63066	22.0866	61.6196
	202.394	1.24719	1.28897	79.9844
	138.701	35.2618	8.86094	77.9803
	1244.79	1.95977	136.458	5.53619
	757.202	92.1876	71.1325	6.66739
	720.615	151.017	188.918	100.247
	666.862	100.382	60.7335	92.4443
	234.662	57.9262	109.525	39.6023
	263.428	156.894	73.9627	15.2831
	129.614	122.935	51.932	43.3598
	18.3482	76.9377	101.557	416.535
	41.8166	101.264	91.6735	112.641
	160.136	153.119	40.1283	229.621
	219.945	15.7665	130.89	129.99
	791.914	36.3268	88.0012	317.387
	76.0037	188.335	6.19177	32.2864
	353.045	59.5019	9.68188	317.917
	391.669	19.7427	0	9.08073
	56.4019	1.05081	57.3843	248.017
	1227.74	65.291	80.4116	357.725
	31.62	108.55	2.23312	206.073
	86.6115	181.36	149.355	224.478
	53.5833	166.02	223.458	59.4626
	167.838	242.643	32.462	4.95276
	442.976	7.32323	222.581	18.5274
	84.8126	25.1401	10.497	209.323
	565.577		55.6839	216.714
	706.375		45.5415	3.56943
	934.677		30.3746	11.3473
	343.381			99.2675
	32.85

## Sheet: Fig4.E
Wtnic	B4-/-nic	B4-/-sal	Wtsal
27.1348499835147	-3.20641282565131	-3.20641282565131	1.34692391700037
57.6331360946746	15.2777777777778	15.2777777777778	5.35917901938426
218.709677419355	34.4262295081967	34.4262295081967	-13.3819951338199
200.977198697068	44.7761194029851	44.7761194029851	2.59365994236312
129.102167182662	15.8730158730159	15.8730158730159	9.67136150234741
327.397260273973	26.2806236080178	26.2806236080178	6.32911392405063
12.3867069486405	2.59779951100244	2.59779951100244	11.5151515151515
20.82957619477	12.8613322161709	12.8613322161709	26.2342691190707
375.147928994083	5.44831880448319	5.44831880448319	33.596837944664
147.658979734451	15.8964879852126	15.8964879852126	16.2826420890937
100.75			9.85915492957746
454.285714285714			39.4190871369294
78.5603314344899			7.8502080443828
289.242053789731			14.5359019264449
107.1875			10.4536489151874
8.65800865800867			35.3996737357259
104.996796925048			23.5836627140975
31.3234542667348			6.93666523050409
			1.34099616858238
			10.0657561962569
			7.22543352601157
			5.73951434878587
			5.65635005336179

## Sheet: Supp 1B
Wt	B4-/-
7.56457564575646	5.1063829787234
4.68468468468468	6.43776824034335
1.57575757575758	2.99500831946755
4.60947503201024	17.2638436482085
5.83190394511149	4.98960498960499
4.28211586901763	4.08496732026144
3.94973070017953	3.40264650283554
2.42718446601942	4.16666666666667

## Sheet: Sup 2A
WT ML	WT DV	WT Current	B4 ML	B4 DV	B4 Current
16.6374781085814	4402.68269383856	263.671	13.214456296768	4425.40996656583	77.2895
27.4637796529215	4400.81197261583	449.724	82.9087724884573	4402.68269383856	4.63066
27.4637796529215	4413.19057474924	202.394	73.0775354242955	4606.11367616622	1.24719
22.3690495144085	4531.20522209839	138.701	91.7648463620443	4506.64703072759	35.2618
27.4637796529215	4430.66390702118	1244.79	59.7038688106989	4349.70546091387	1.95977
17.3539245343098	4476.79509632224	757.202	0	4349.70546091387	92.1876
15.2045852571247	4402.04585257125	720.615	66.4703072759115	4493.15395637637	151.017
25.9910842222576	4476.79509632224	666.862	79.7245661518867	4485.11383537653	100.382
6.01018946027703	4445.19184843178	234.662	32.9963381627129	4445.19184843178	57.9262
8.39834421270498	4415.45932176405	263.428	104.52157299793	4569.81372392931	156.894
1.51249800987104	4427.79812131826	129.614	96.322241681261	4445.19184843178	122.935
3.86085018309186	4455.26190097118	18.3482	61.8930106670912	4432.53462824391	76.9377
0	4506.64703072759	41.8166	0	4457.5704505652	101.264
23.8417449450724	4467.16287215412	160.136	18.3887915936953	4531.84206336571	153.119
52.220983919758	4476.79509632224	219.945	10.9059067027543	4360.57156503742	15.7665
3.86085018309186	4566.35089953829	791.914	109.576500557236	4432.53462824391	36.3268
0.0398025792071327	4433.96752109537	76.0037	11.4631428116542	4432.53462824391	188.335
18.3887915936953	4399.33927718516	353.045	79.7245661518867	4402.68269383856	59.5019
71.4058270975959	4446.94316191689	391.669	67.6643846521255	4463.30202197102	19.7427
30.011144722178	4425.40996656583	56.4019	36.618372870562	4390.42349944276	65.291
0.557236108899857	4484.99442763891	1227.74	59.1466327017991	4388.87119885369	108.55
19.3440534946665	4397.8665817545	31.62	59.1466327017991	4487.1835694953	181.36
94.849546250597	4463.66024518389	86.6115	17.0355039006528	4402.9215093138	166.02
8.79637000477631	4460.71485432256	53.5833	11.3437350740328	4487.1835694953	242.643
119.686355675848	4588.00350262697	167.838	23.0058907817227	4491.68126094571	7.32323
7.80130552459799	4449.37111924853	442.976	37.5338321923261	4379.55739531922	25.1401
22.0108263015443	4419.55898742239	84.8126
17.5927400095526	4422.82279891737	565.577
118.293265403598	4518.9858302818	706.375
37.6532399299475	4482.7256806241	934.677
32.4789046330202	4413.19057474924	343.381
2.30854959401369	4350.4617099188	32.85

## Sheet: Sup 2B
WT ML	WT DV	B4-/- ML	B4-/- DV
83.9607843137255	4913.92156862745	78.1960784313726	4604.66666666667
208.43137254902	4634.27450980392	160.862745098039	4692.90196078431
220.352941176471	4693.09803921569	44.7843137254902	4792.07843137255
204.470588235294	4678.03921568627	121.725490196078	4833.33333333333
90.8627450980392	4497.13725490196	194.627450980392	4752.62745098039
122.156862745098	4445.13725490196	102.666666666667	4793.88235294118
299.411764705882	4577.8431372549	256.352941176471	4478.3137254902
72.8627450980392	4399.76470588235	44.9411764705882	4735.72549019608
102.235294117647	4604.86274509804	143.607843137255	4649.64705882353
70.4313725490196	4951.6862745098	329.450980392157	4673.72549019608
155.607843137255	4505.52941176471
95.6862745098039	4525.80392156863
132.666666666667	4640.58823529412
108.862745098039	4598.07843137255
194.313725490196	4496.11764705882
93.2156862745098	4365.33333333333
80.2352941176471	4508.78431372549
8.58823529411765	4573.33333333333

## Sheet: Sup 2C
WT ML	WTNicEvoked	B4-/- ML	B4-/-NicEvoked		WT DV	WTNicEvoked	B4-/- DV	B4-/-NicEvoked
83.9607843137255	3.53333333333333	78.1960784313726	0.466666666666667		4913.92156862745	3.53333333333333	4604.66666666667	0.466666666666667
208.43137254902	2.05555555555556	160.862745098039	9.50833333333333		4634.27450980392	2.05555555555556	4692.90196078431	9.50833333333333
220.352941176471	2.8	44.7843137254902	0.775		4693.09803921569	2.8	4792.07843137255	0.775
204.470588235294	5.13333333333333	121.725490196078	0.875		4678.03921568627	5.13333333333333	4833.33333333333	0.875
90.8627450980392	5.27777777777778	194.627450980392	2.575		4497.13725490196	5.27777777777778	4752.62745098039	2.575
122.156862745098	5.05555555555556	102.666666666667	1.46666666666667		4445.13725490196	5.05555555555556	4793.88235294118	1.46666666666667
299.411764705882	0.15	256.352941176471	8.61666666666667		4577.8431372549	0.15	4478.3137254902	8.61666666666667
72.8627450980392	0.883333333333333	44.9411764705882	4.49166666666667		4399.76470588235	0.883333333333333	4735.72549019608	4.49166666666667
102.235294117647	10.6166666666667	143.607843137255	14.825		4604.86274509804	10.6166666666667	4649.64705882353	14.825
70.4313725490196	8.71666666666667	329.450980392157	0.325		4951.6862745098	8.71666666666667	4673.72549019608	0.325
155.607843137255	6.67777777777778				4505.52941176471	6.67777777777778
95.6862745098039	7.87777777777778				4525.80392156863	7.87777777777778
132.666666666667	12.6222222222222				4640.58823529412	12.6222222222222
108.862745098039	9.73888888888889				4598.07843137255	9.73888888888889
194.313725490196	5.69444444444445				4496.11764705882	5.69444444444445
93.2156862745098	0.533333333333334				4365.33333333333	0.533333333333334
80.2352941176471	6.77222222222222				4508.78431372549	6.77222222222222
8.58823529411765	5.11111111111111				4573.33333333333	5.11111111111111

## Sheet: Sup 2D
WT ML	WTSpont	B4-/- ML	B4-/-spont		WT DV	WTSpont	B4-/- DV	B4-/-spont
83.9607843137255	14.9020833333333	78.1960784313726	3.1125		4913.92156862745	14.9020833333333	4604.66666666667	3.1125
208.43137254902	3.93333333333333	160.862745098039	7.05208333333333		4634.27450980392	3.93333333333333	4692.90196078431	7.05208333333333
220.352941176471	1.73541666666667	44.7843137254902	1.2625		4693.09803921569	1.73541666666667	4792.07843137255	1.2625
204.470588235294	3.03541666666667	121.725490196078	1.36190476190476		4678.03921568627	3.03541666666667	4833.33333333333	1.36190476190476
90.8627450980392	4.5	194.627450980392	2.2047619047619		4497.13725490196	4.5	4752.62745098039	2.2047619047619
122.156862745098	1.69285714285714	102.666666666667	2.59791666666667		4445.13725490196	1.69285714285714	4793.88235294118	2.59791666666667
299.411764705882	1.37291666666667	256.352941176471	17.05625		4577.8431372549	1.37291666666667	4478.3137254902	17.05625
72.8627450980392	4.66666666666667	44.9411764705882	19.46875		4399.76470588235	4.66666666666667	4735.72549019608	19.46875
102.235294117647	3.28958333333333	143.607843137255	22.43125		4604.86274509804	3.28958333333333	4649.64705882353	22.43125
70.4313725490196	10.1229166666667	329.450980392157	4.29583333333333		4951.6862745098	10.1229166666667	4673.72549019608	4.29583333333333
155.607843137255	10.9854166666667				4505.52941176471	10.9854166666667
95.6862745098039	3.18333333333333				4525.80392156863	3.18333333333333
132.666666666667	13.9229166666667				4640.58823529412	13.9229166666667
108.862745098039	11.8145833333333				4598.07843137255	11.8145833333333
194.313725490196	6.06458333333333				4496.11764705882	6.06458333333333
93.2156862745098	9.63958333333333				4365.33333333333	9.63958333333333
80.2352941176471	10.4729166666667				4508.78431372549	10.4729166666667
8.58823529411765	17.09375				4573.33333333333	17.09375

## Sheet: Sup 2E_F
WTSpont	B4-/-spont	WTNicEvoked	B4-/-NicEvoked
14.9020833333333	3.1125	3.53333333333333	0.466666666666667
3.93333333333333	7.05208333333333	2.05555555555556	9.50833333333333
1.73541666666667	1.2625	2.8	0.775
3.03541666666667	1.36190476190476	5.13333333333333	0.875
4.5	2.2047619047619	5.27777777777778	2.575
1.69285714285714	2.59791666666667	5.05555555555556	1.46666666666667
1.37291666666667	17.05625	0.15	8.61666666666667
4.66666666666667	19.46875	0.883333333333333	4.49166666666667
3.28958333333333	22.43125	10.6166666666667	14.825
10.1229166666667	4.29583333333333	8.71666666666667	0.325
10.9854166666667		6.67777777777778
3.18333333333333		7.87777777777778
13.9229166666667		12.6222222222222
11.8145833333333		9.73888888888889
6.06458333333333		5.69444444444445
9.63958333333333		0.533333333333334
10.4729166666667		6.77222222222222
17.09375		5.11111111111111

[truncated: 1 more sheets:  Sup 2G]
