# Supplementary material for: Prolonged nicotine exposure reduces aversion to the drug in mice by altering nicotinic transmission in the interpeduncular nucleus
Source: eLife. 2023 May 30;12:e80767. doi: 10.7554/eLife.80767 (PMC10259488; doi:10.7554/eLife.80767)
Supplement: Figure 5—source data 1. [file elife-80767-fig5-data1.xlsx]

## Sheet: Fig5.B
Nicotine Current (-pA)	B4 VEC GFP	B4 VEC B4
	15.8189	79.987
	132.181	301.905
	128.458	495.81
	63.0446	346.169
	9.49949	190.749
	65.1677	268.755
	80.4195	850.402

## Sheet: Fig5.C
B4GFPnic	B4VECnic	B4GFPsal	B4VECsal
2.04307012700166	184.636118598383	-2.60869565217391	76.0765550239234
21.304347826087	179.136690647482	12.4246079613993	6.60146699266504
6.21468926553671	171.679197994987	7.91788856304986	-4.01002506265664
57.4257425742574	63.2398753894081	13.4199134199134	30.9803921568627
66.0377358490566	177.272727272727	2
44.3012884043607		14.5679012345679
8.43373493975903		2.37777184076944

## Sheet: Fig5.D
	B4 VEC GFP 1	B4 VEC GFP 2	B4 VEC GFP 3	B4 VEC GFP 4	B4 VEC GFP 5	B4 VEC GFP 6	B4 VEC GFP 7	B4 VEC GFP 8	B4 VEC GFP 9	B4 VEC GFP 10	B4 VEC GFP 11	B4 VEC GFP 12	B4 VEC GFP 13	B4 VEC GFP 14	B4 VEC GFP 15	B4 VEC GFP 16	B4 VEC GFP 17	B4 VEC GFP 18
0 ug/ml	0	0	0	0	0	0	0	0	0	0	0	0	0	0	0	0	0	0
10 ug/ml	1.0375	0.929838709677419	1.38148148148148	1.26696428571429	0.910714285714286	0.696759259259259	1.63173076923077	1.3	0.129346153846154	1.17949735449735	1.13269230769231	0.279166666666667	0.613392857142857	1.21065384615385	1.025	1.597	0.984615384615385	1.16880769230769
50 ug/ml	5.90277777777778	3.65625	5.79985754985755	6.05201149425287	4.96428571428571	7.72364672364672	4.92307692307692	3.17857142857143	1.21711538461538	8.16203703703704	6.235	0.723958333333333	4.3760775862069	7.38576923076923	5.875	7.625	5.4375	7.42365384615385
100 ug ml	10.3333333333333	1.89516129032258	12.7788461538462	7.825	7.34821428571429	14.5925925925926	9.06481481481481	5.63793103448276	4.72115384615385	17.9464285714286	10.5165384615385	0.87	9.50892857142857	13.25	9.99	12.78	11.8397435897436	11.7126923076923
200 ug/ml	14.7592592592593	0.727822580645161	23.0961538461538	7.88333333333333	15.3214285714286	24.5	12.7003968253968	5.78333333333333	25	30.9082512315271	14.3653846153846	1.14	11.6896551724138	26.7446153846154	14.88	29.32	16.8148148148148	25.1738461538462
	B4 VEC B4 1	B4 VEC B4 2	B4 VEC B4 3	B4 VEC B4 4	B4 VEC B4 5	B4 VEC B4 6	B4 VEC B4 7	B4 VEC B4 8	B4 VEC B4 9	B4 VEC B4 10	B4 VEC B4 11	B4 VEC B4 12	B4 VEC B4 13	B4 VEC B4 14	B4 VEC B4 15	B4 VEC B4 16	B4 VEC B4 17
0 ug/ml	0	0	0	0	0	0	0	0	0	0	0	0	0	0	0	0	0
10 ug/ml	0.743589743589744	1.13392857142857	0.960583333333333	0.855769230769231	0.66875	1.31086956521739	0.146875	1.47134408602151	1.35267857142857	0.576785714285714	1.10603846153846	1.07777777777778	1.92623655913978	0.712212643678161	0.182407407407407	1.09059829059829	1.01416666666667
50 ug/ml	4.33498677248677	5.68303571428571	3.97375	5.0787037037037	3.55241402116402	5.5294384057971	0.59375	5.3877688172043	5.66579433497537	4.70689655172414	4.42307692307692	4.30009920634921	4.48884408602151	4.47083333333333	0.245535714285714	0.697115384615385	4.36854838709677
100 ug ml	8.23214285714286	7.32142857142857	8.8	9.57407407407407	4.99107142857143	2.25	2.06	6.37903225806452	8.83620689655172	9.93965517241379	9.56730769230769	8.14285714285714	10.1153225806452	11.7833333333333	2.57142857142857	5.40740740740741	10.5209677419355
200 ug/ml	9.44642857142857	5.75862068965517	4.1	15.6666666666667	10.7887931034483	13	1.32	5.48333333333333	13.2758620689655	15.4310344827586	15.4423076923077	10.8392857142857	4.38709677419355	8.46666666666667	1.39285714285714	2.2037037037037	23.3387096774194

## Sheet: Fig5.F
	0 ug/ml				10 ug/ml				50 ug/ml				100 ug/ml				200 ug/ml
	0	Side	1		0	Side	1		0	Side	1		0	Side	1		0	Side	1
B4 VEC GFP 1	0.551286497932923	0.279473061986575	0.541706147639135		0.55911435759378	0.256268732908357	0.553390062274228		0.53907793746328	0.429163143104037	0.471342484070516		0.550767428730758	0.26031967150391	0.558224181359277		0.520399141877925	0.239936601105271	0.613315064984931
B4 VEC GFP 2	0.565085261436328	0.240055363715399	0.561990874171293		0.566224337292899	0.17438470706272	0.633071700430582		0.567456871560494	0.177185096026958	0.627494821267448		0.137404745107672	0.607775425367378	0.863273599629082		0.0197381685537595	0.690880771294217	0.980615125537984
B4 VEC GFP 3	0.630638706353573	0.181601460159799	0.560953950831483		0.842808137206227	0.513095247114626	0.198932972656411		0.902689881378831	0.631331741833741	0.0983701222100289		0.889612318699083	0.602769268775976	0.118007242017039		0.924306802598617	0.642104801106074	0.0779524046812255
B4 VEC GFP 4	0.475941804161415	0.403522479327054	0.543144840027205		0.565611492657371	0.33041228592307	0.492128615763797		0.496052124875658	0.411523137482216	0.519552427624057		0.279762150230752	0.536770500152721	0.720515783743603		0.189688296420849	0.569233275199119	0.812153422593817
B4 VEC GFP 5	0.416417134108201	0.350812284544286	0.643003103106687		0.424450083432991	0.390196664882844	0.605424769539047		0.478331543645435	0.471401433048945	0.5233685730789		0.408508761784338	0.426413802753653	0.606635045494202		0.618824669649026	0.354513993286773	0.432436037065732
B4 VEC GFP 6	0.453705602702851	0.311192605014998	0.628357944217357		0.435326181117144	0.399023460872616	0.588618674346565		0.923463689020005	0.638109255821569	0.0800107451871089		0.961762317547001	0.67813643525622	0.0383909864343684		0.923427917743203	0.648257444216339	0.0771552291976854
B4 VEC GFP 7	0.463935730950057	0.331569797044525	0.597313916535733		0.642155706373166	0.376998261588267	0.401273758483164		0.592945626308761	0.43895734702579	0.417149336161772		0.568733552855009	0.354690242810118	0.474931253772661		0.461428361078419	0.314253448039091	0.614990658102388
B4 VEC GFP 8	0.571886749996211	0.464464219509416	0.431521222480346		0.729391556486373	0.409329811939595	0.32367003869196		0.38003105965809	0.36547497582352	0.683085262854192		0.322762220665854	0.429545923241511	0.710618181326697		0.198417173203158	0.5112926549366	0.850241447625938
B4 VEC GFP 9	0.633330596094959	0.228781718485779	0.516057703550356		0.0800183666078498	0.634442636037326	0.926090361521254		0.156239167158715	0.562024276077257	0.861885203491904		0.272799215049136	0.487817803858143	0.741070670351034		0.892516096420494	0.582639032676572	0.128875489667941
B4 VEC GFP 10	0.566797337903308	0.351745861932835	0.478332032000831		0.750197299767009	0.525522610556927	0.253500711232196		0.958596611224783	0.677692772404606	0.0414171154770405		0.961276217904304	0.678722565702663	0.0387837496689969		0.960750257044742	0.679332893537205	0.039258184617042
B4 VEC GFP 11	0.346239060852213	0.493705502930096	0.65592810422837		0.658236644545379	0.258944273836027	0.475561851406789		0.664238319706667	0.260096005039615	0.471415039974012		0.647553489016869	0.245266636089223	0.493125339458088		0.478215330724542	0.332605760831788	0.579721373532373
B4 VEC GFP 12	0.388985537049671	0.425051260413994	0.629173423437083		0.204543113677494	0.503846965258617	0.852383405793888		0.0627041143722561	0.663891458872319	0.937297826547001		0.0430423645486511	0.668917227622535	0.959240996530738		0.0273499611338135	0.684615175041169	0.973162569655824
B4 VEC GFP 13	0.566309027725289	0.296620384872058	0.514463590910773		0.37867561099778	0.368108489299352	0.682414705354687		0.588966444042391	0.184447441797188	0.593553060817031		0.540464811155499	0.246525839073077	0.581887289429579		0.374548512870618	0.361806338117287	0.696876781573894
B4 VEC GFP 14	0.478361430114396	0.318523054522466	0.590212390852675		0.480747512874946	0.389619962398846	0.544013853154997		0.585268549047628	0.282777167916643	0.508096407250294		0.525225998604581	0.392604793433123	0.497704683922197		0.514756096587922	0.488262093027638	0.485530034913722
B4 VEC GFP 15	0.531456639406328	0.409228332403122	0.485166827807674		0.494993032622507	0.339141105776383	0.556630359982488		0.563584111729899	0.261239664367016	0.54479460972539		0.499434535202072	0.329453673849372	0.558286936824813		0.381278166251705	0.404328692985957	0.649275400415266
B4 VEC GFP 16	0.416517524803595	0.490599315004445	0.584050243023473		0.555227586040371	0.37124812891533	0.478653471510204		0.594995281623763	0.322844660845012	0.471510404630354		0.540755998124785	0.375391641977183	0.49034566611303		0.537504276648312	0.345763607685122	0.509216149662489
B4 VEC GFP 17	0.607415118328155	0.448064152748931	0.40115140629616		0.524499022021756	0.475737624416404	0.476739431722032		0.569541362937554	0.37122176262426	0.46545434185991		0.639073920038676	0.364346671698085	0.410953125855311		0.490377530700342	0.452556788473795	0.514146451257144
B4 VEC GFP 18	0.569609566603429	0.228936634554682	0.567890669536727		0.505637706584759	0.376701418203505	0.524388393247291		0.580211050437577	0.313707155235091	0.490121588678033		0.606748505666938	0.219369585589937	0.543535211457402		0.614409773690263	0.215949185933883	0.540691847455588
	0 ug/ml				10 ug/ml				50 ug/ml				100 ug/ml				200 ug/ml
	0	Side	1		0	Side	1		0	Side	1		0	Side	1		0	Side	1
B4 VEC B4 1	0.529467280382542	0.202600550615012	0.649772634212527		0.429847028595365	0.35868541603627	0.618987523197686		0.641819168530611	0.165627818649619	0.568908074874224		0.581295655197479	0.268326917748712	0.522817768051445		0.347605341976706	0.378676001957548	0.725452412375826
B4 VEC B4 2	0.770796982197311	0.383243868990214	0.327811041994446		0.603610615830712	0.363573077585292	0.439642982435524		0.596596029569039	0.363258348427668	0.44574548857914		0.389140914473593	0.457301077460198	0.617794377709495		0.179512744134295	0.557052499884605	0.828860479365687
B4 VEC B4 3	0.605108167234669	0.264368073426425	0.506364444992088		0.638407406352266	0.213154689536315	0.52665458187019		0.594057734418066	0.142543327526843	0.638768703064252		0.52408111002574	0.287319619949569	0.56337923229226		0.134991139422324	0.575288353888327	0.890984228731068
B4 VEC B4 4	0.382297884784259	0.495419049010918	0.618456867330596		0.566150375443639	0.242850884374546	0.558393608148362		0.609811847516514	0.316731377090388	0.463711198198449		0.580282707594444	0.415311353722837	0.436549604161095		0.424482073698425	0.450553646695493	0.582038696419742
B4 VEC B4 5	0.847328336644338	0.493236014273758	0.214942485900341		0.428157566490301	0.289825193054176	0.70545567350266		0.371244161986765	0.366932733519848	0.696276251164302		0.276325324728927	0.475992312604349	0.743186556267006		0.311673598338668	0.431928029769763	0.725417602441229
B4 VEC B4 6	0.58773643908823	0.259974052710436	0.524055077670497		0.607476283067329	0.23702528799538	0.527340816811128		0.452051352339896	0.304131178258309	0.638121797202024		0.118694599016659	0.588412182169888	0.919907004063959		0.371565629075199	0.348315088118469	0.7251945288572
B4 VEC B4 7	0.472092803130649	0.496671249636331	0.52794115897668		0.0926587349617637	0.62547585866032	0.912655296605952		0.0577374174535362	0.663630825910664	0.942535925984886		0.109073920213686	0.600680282525457	0.910872327577033		0.0311872925976555	0.683906758887065	0.968887848922149
B4 VEC B4 8	0.793248716985861	0.553041142700975	0.209612659885776		0.73829514729478	0.494236379048035	0.272575707268877		0.633433025187309	0.239294004552982	0.506914488126197		0.422679776254276	0.402413279935055	0.601175403623852		0.223366951671203	0.507774096355326	0.798417337904799
B4 VEC B4 9	0.56153050042965	0.441068128051832	0.446422193739121		0.695637017719037	0.402565597696886	0.348333291146112		0.595841592195013	0.260249654770748	0.517076275998037		0.447173930745381	0.361722281299048	0.595909458855911		0.368163041722978	0.408581881651135	0.663331359400321
B4 VEC B4 10	0.325437988253763	0.503853619249539	0.676322193310368		0.383942079254014	0.350104025917973	0.695274092373663		0.620281065100792	0.103259902467736	0.66083070945565		0.612936634164371	0.225100883271215	0.533603030649641		0.50701455457916	0.235542998804155	0.638330209429733
B4 VEC B4 11	0.47615450481364	0.419459424871114	0.537150236078299		0.490669335935571	0.498650725287031	0.509334793240439		0.446461562250035	0.41502865686012	0.569757286810095		0.482863261259624	0.463910098070239	0.519795430332904		0.446087105537394	0.332500071693236	0.618964113031892
B4 VEC B4 12	0.59841885406887	0.306144953932896	0.480103209943985		0.574774197906285	0.426567382394611	0.437898162611431		0.439348547284187	0.388094047307455	0.589539431346378		0.425801095131905	0.481670014205935	0.575394992227564		0.323578204511292	0.407048022176603	0.732508683098472
B4 VEC B4 13	0.66456808829766	0.493642341438891	0.338059892089345		0.887000793918268	0.611020308282679	0.116535571205027		0.401935793342985	0.40329721864298	0.62470168493269		0.370547871773494	0.467553301056376	0.63520373662675		0.148869326179439	0.558237455007109	0.900904576618864
B4 VEC B4 14	0.572125992263646	0.175230651272767	0.62378756804633		0.371092059301562	0.384352554277398	0.678047609498281		0.579469732701913	0.142319456502331	0.663138482044868		0.636364673361469	0.105624143069059	0.637265842156852		0.231984409653828	0.481553952404043	0.817712297327349
B4 VEC B4 15	0.616238975088434	0.136316280915829	0.620345481510801		0.128351159018225	0.584442938742563	0.890514286776039		0.0335496787586967	0.680810318180257	0.966744309749261		0.128321604615331	0.613599204692783	0.872347654829233		0.0545003250321647	0.652606456154383	0.962234475901993
B4 VEC B4 16	0.350185654748996	0.438900947674269	0.668538901128288		0.543693568190639	0.23916617428388	0.585491303412298		0.0611835297440205	0.652239562542617	0.942682619948647		0.258411322932456	0.464739454991774	0.783281340626054		0.0619792178786995	0.645127563307848	0.957177921255772
B4 VEC B4 17	0.371384846957997	0.437439982392327	0.644128263617981		0.561429982178503	0.303104535773824	0.514256333602812		0.501297452011181	0.246714665702249	0.632394756555012		0.568240090491531	0.311181399817418	0.502406509944207		0.610144560602144	0.3619887491751	0.435106125216073
