# Supplementary figures and images for: Prolonged nicotine exposure reduces aversion to the drug in mice by altering nicotinic transmission in the interpeduncular nucleus
Source: eLife journal article supplement (doi:10.7554/elife.80767), 2023-05-30

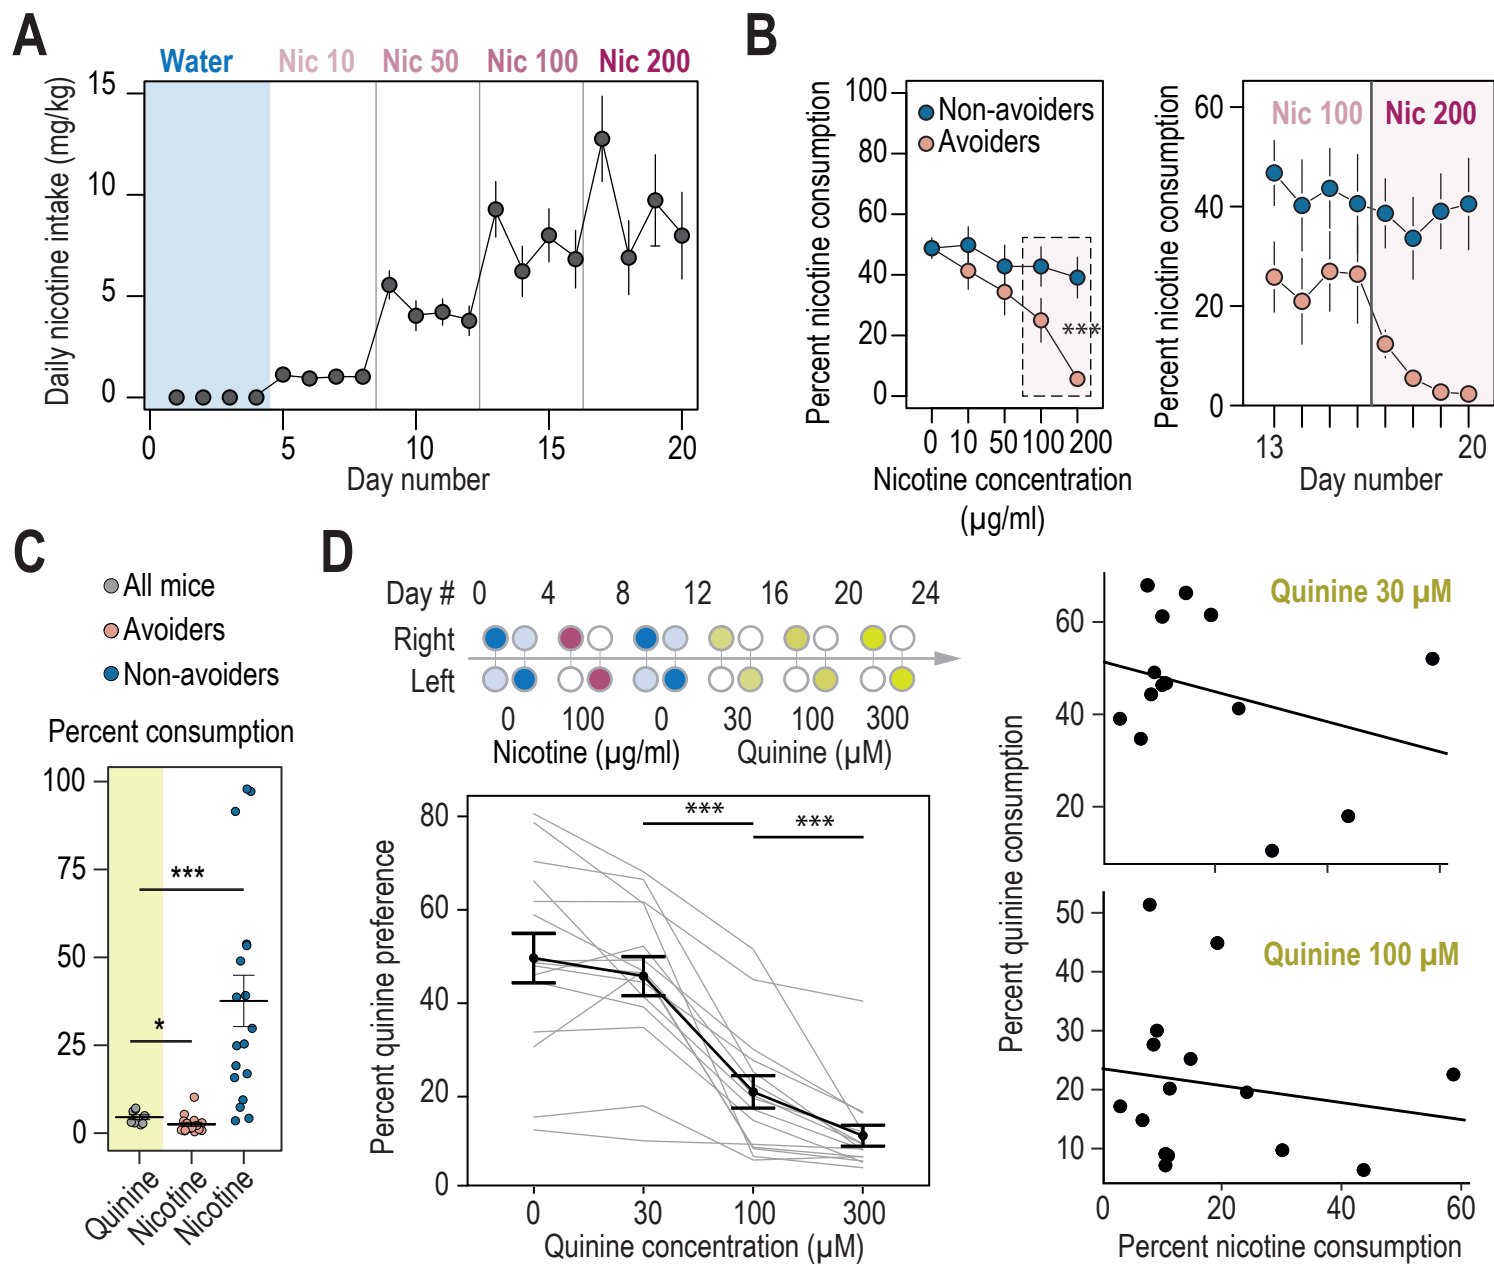

**FIGURE 1- figure supplement 1**

Supplement: supp [file elife_poa_e80767_Figure_1_figure_supplement_1.pdf › elife_poa_e80767_Figure_1_figure_supplement_1.pdf]

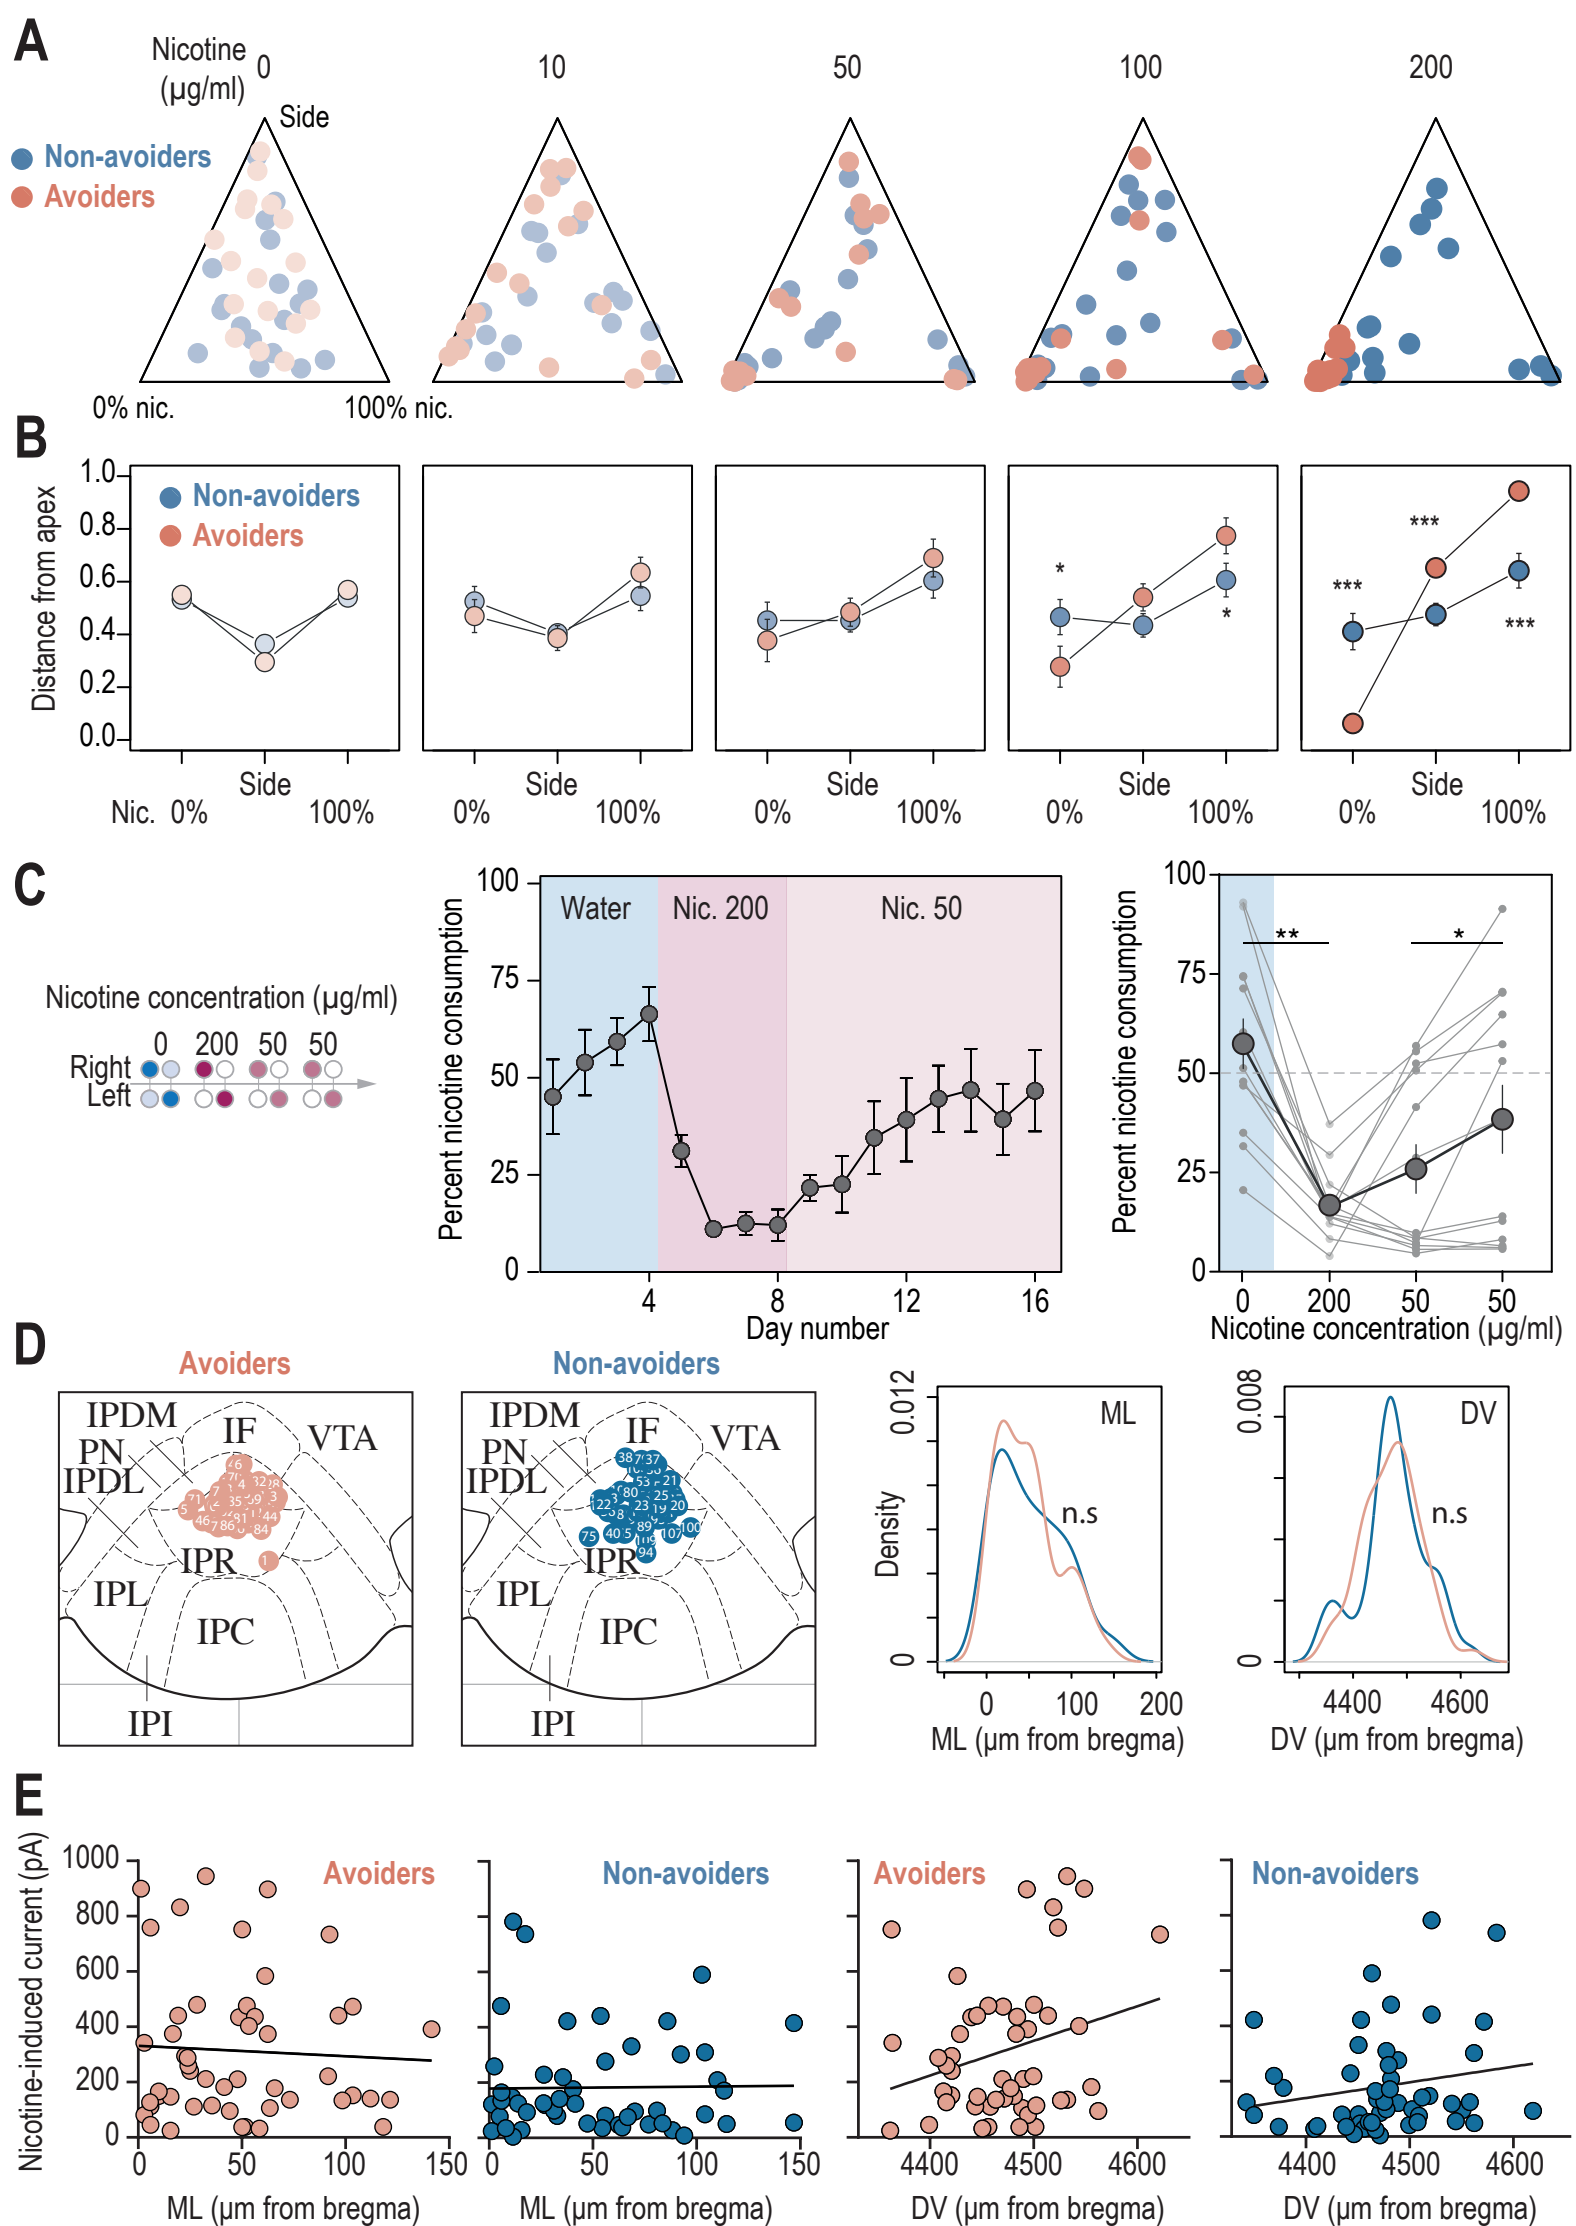

**FIGURE 2-figure supplement 1**

Supplement: supp [file elife_poa_e80767_Figure_2_figure_supplement_1.pdf › elife_poa_e80767_Figure_2_figure_supplement_1.pdf]

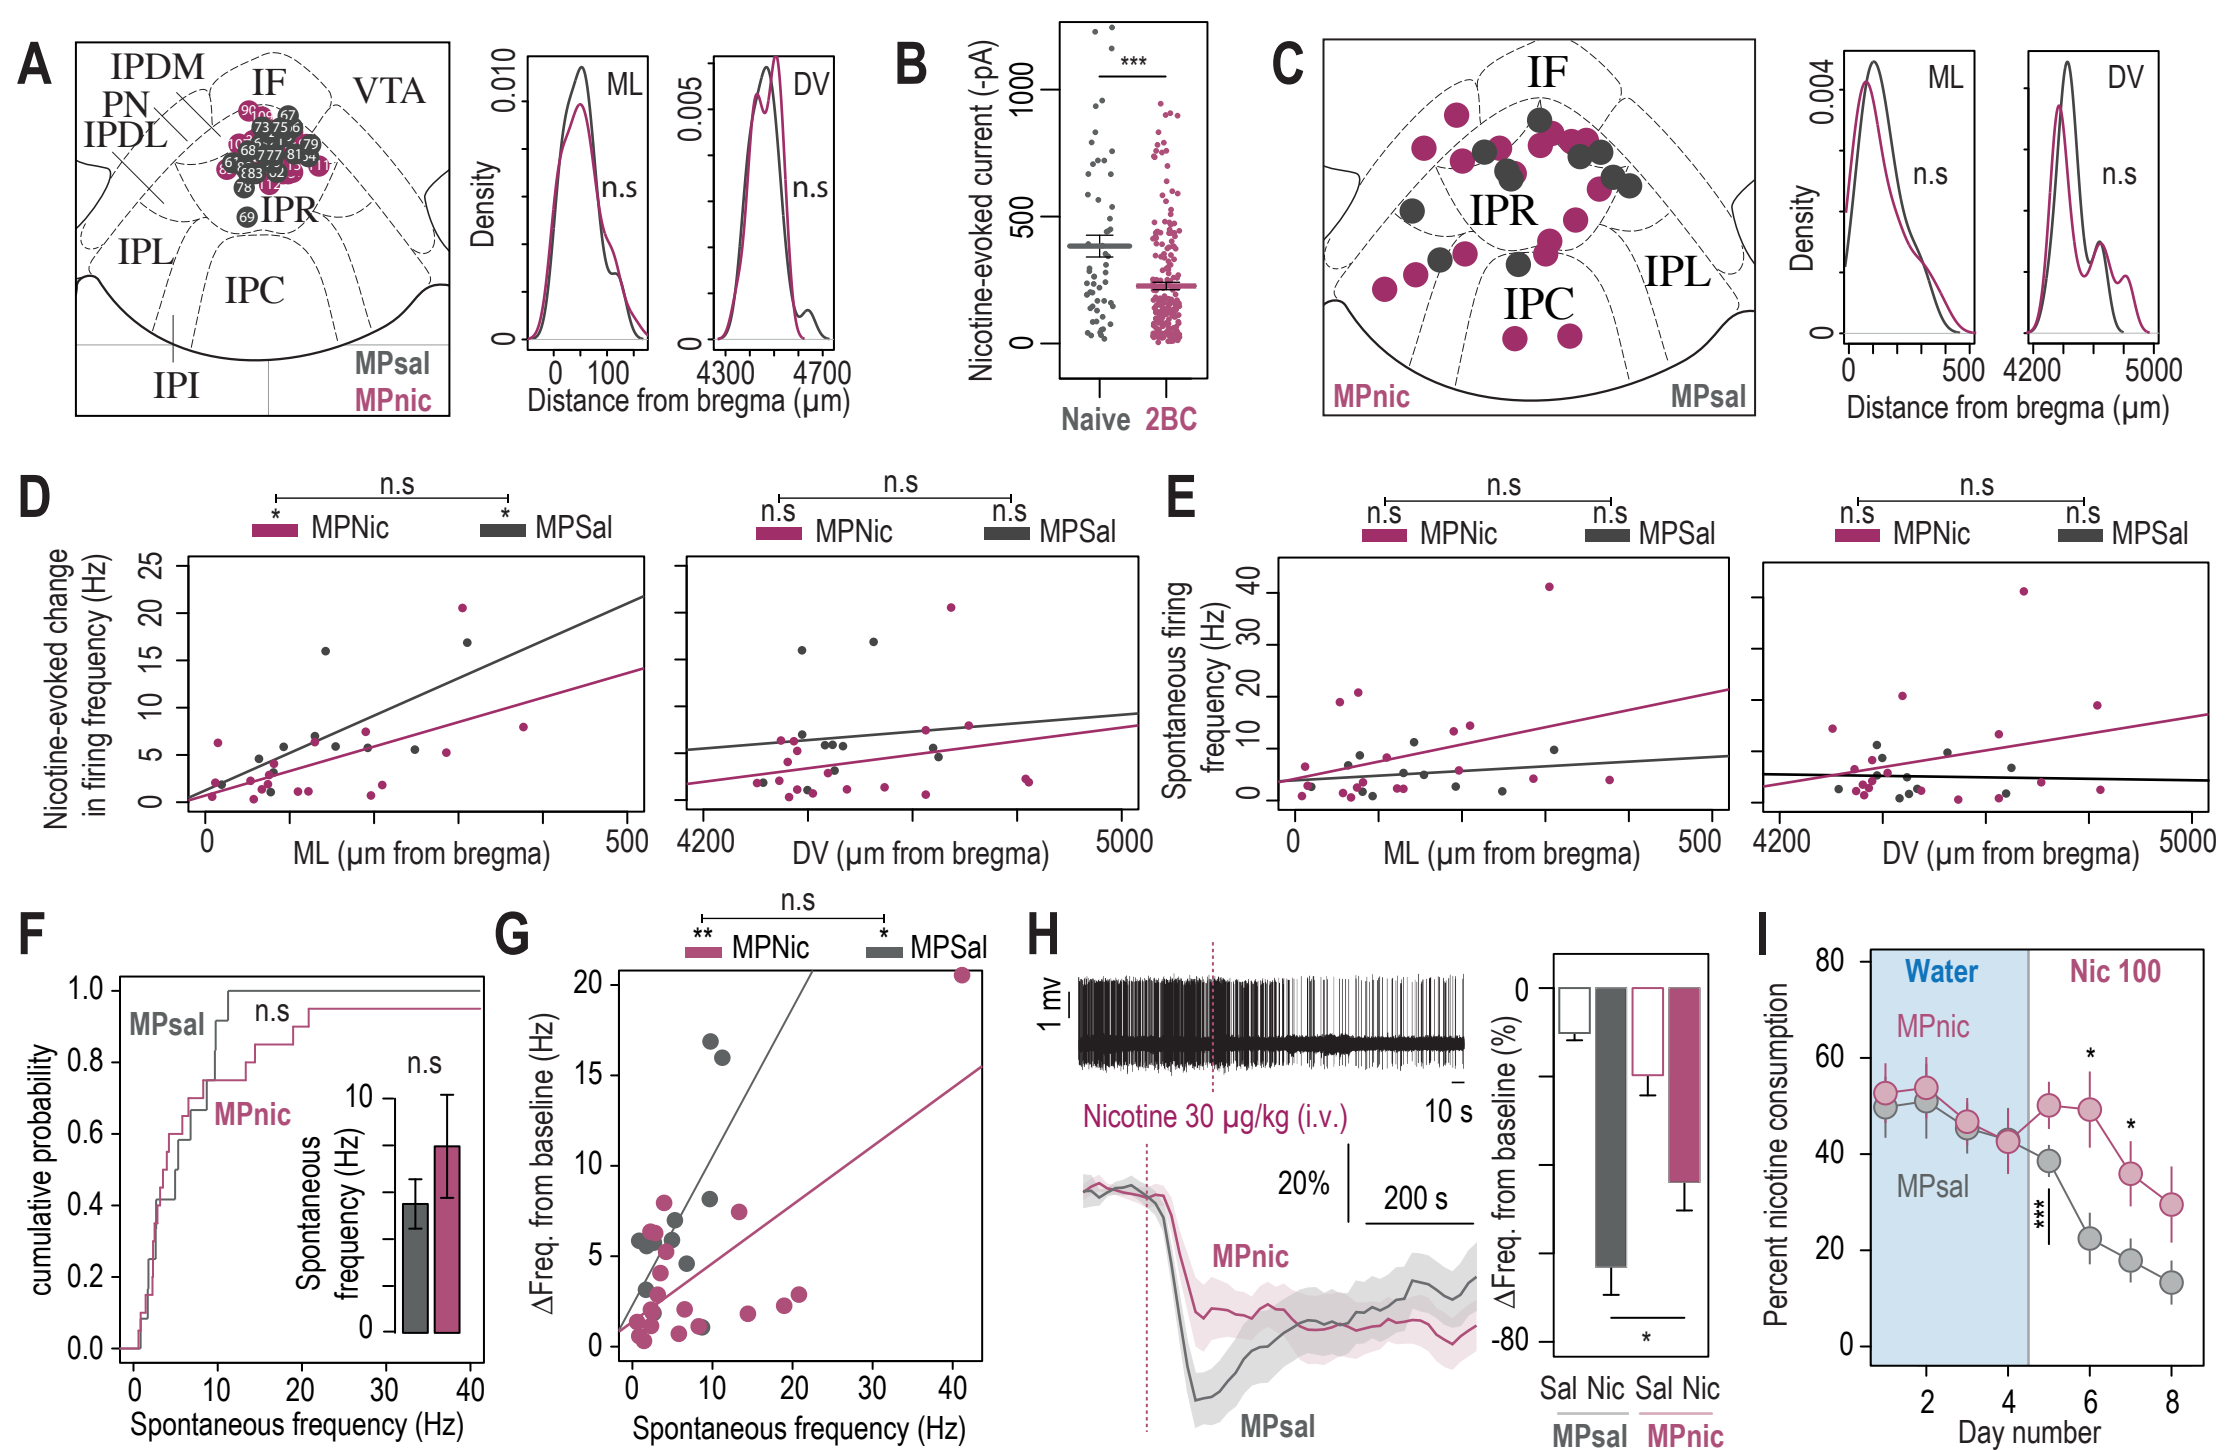

**FIGURE 3-figure supplement 1**

Supplement: supp [file elife_poa_e80767_Figure_3_figure_supplement_1.pdf › elife_poa_e80767_Figure_3_figure_supplement_1.pdf]

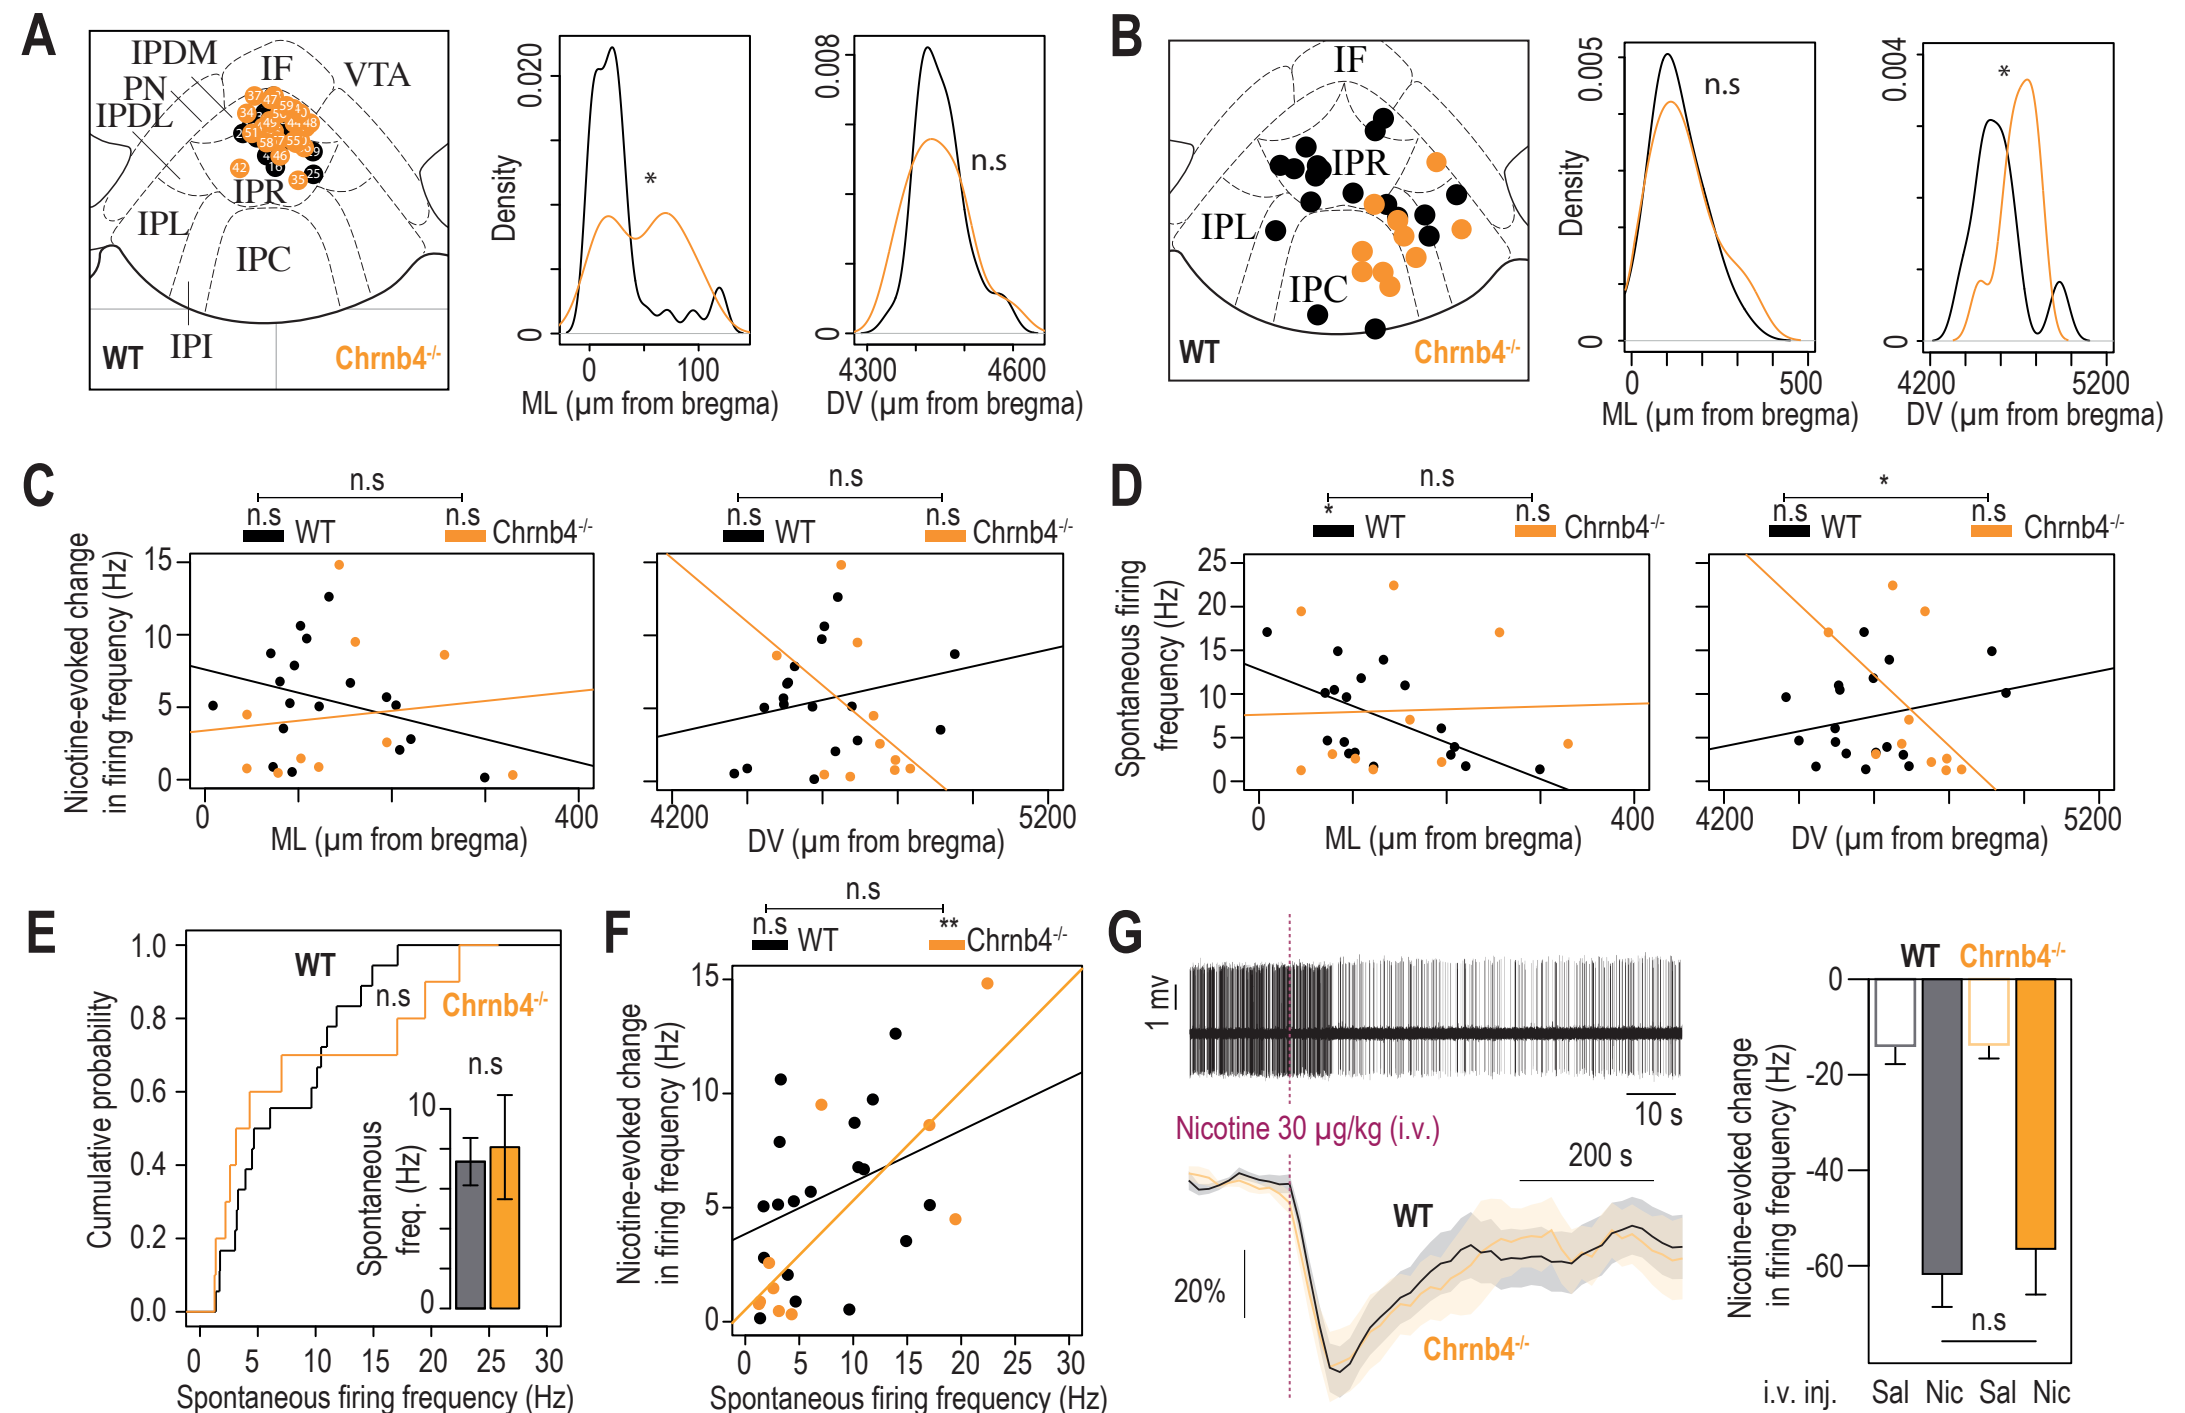

**FIGURE 4- figure supplement 2**

Supplement: supp [file elife_poa_e80767_Figure_4_figure_supplement_2.pdf › elife_poa_e80767_Figure_4_figure_supplement_2.pdf]

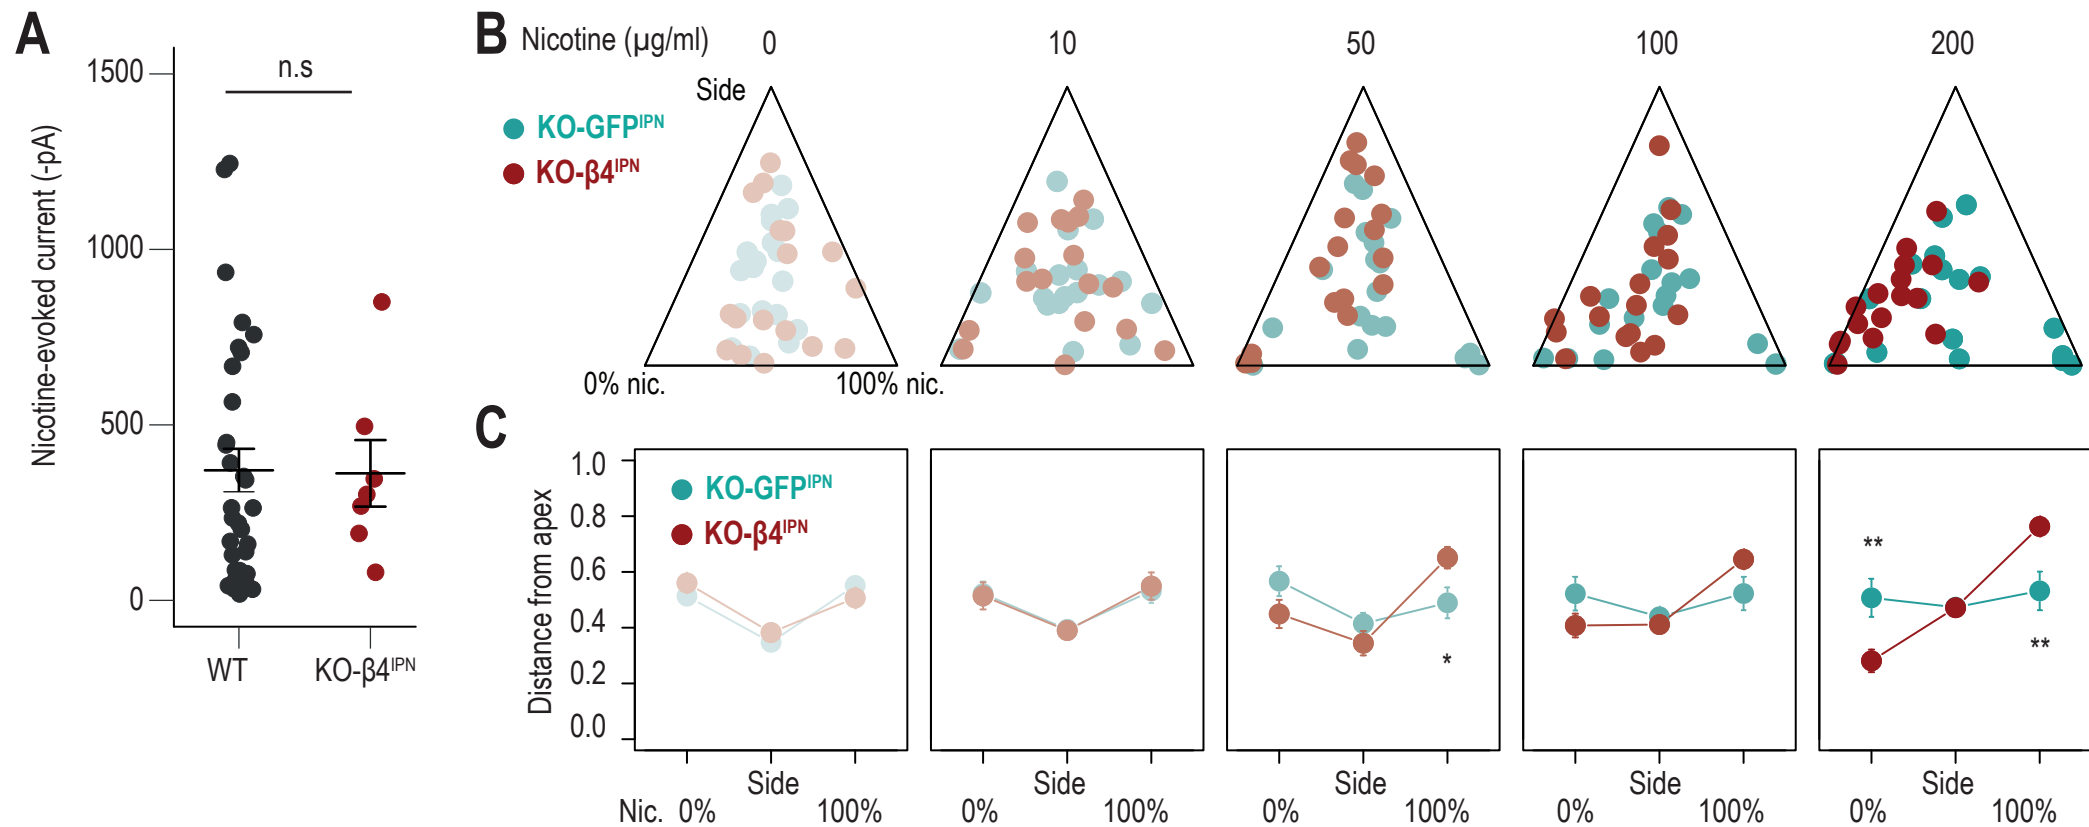

**FIGURE 5-figure supplement 1**

Supplement: supp [file elife_poa_e80767_Figure_5_figure_supplement_1.pdf › elife_poa_e80767_Figure_5_figure_supplement_1.pdf]
